# Supplementary material for: Body Roundness Index and Waist–Hip Ratio Result in Better Cardiovascular Disease Risk Stratification: Results From a Large Chinese Cross-Sectional Study
Source: PubMed Central journal article supplement (PMC8960742; doi:10.3389/fnut.2022.801582), 2022-03-10
Supplement: Data_Sheet_1.pdf [file Data_Sheet_1.pdf]

## Supplemental Material

**Table S1.** Optimal BMI-specific BRI, WHtR and WHR thresholds for identifying participants with CVD associated risk factor among Chinese

**Table S2.** Odds ratios for high BRI, high WHtR and high WHR and having at least one CVD risk factors by age stratification

**Figure S1.** Distribution of anthropometric indices by gender and BMI category among Hunan Chinese

**Figure S2.** Association between CVD risk factors and anthropometric indices among underweight Chinese

**Figure S3.** Association between CVD risk factors and anthropometric indices among normal weight Chinese \*

**Figure S4.** Association between CVD risk factors and anthropometric indices among overweight Chinese \*

**Figure S5.** Association between CVD risk factors and anthropometric indices among obese Chinese \*

**Figure S6.** Comparison on area under curves for diagnosing hypercholesterolemia between different waist and hip indices within each BMI category

**Figure S7.** Comparison on area under curves for diagnosing hypertriglyceridemia between different waist and hip indices within each BMI category

**Figure S8.** Comparison on area under curves for diagnosing mixed hyperlipidemia between different waist and hip indices within each BMI category

**Figure S9.** Comparison on area under curves for diagnosing dyslipidemia between different waist and hip indices within each BMI category

**Figure S10.** Comparison on area under curves for diagnosing hypertension between different waist and hip indices within each BMI category

**Figure S11.** Comparison on area under curves for diagnosing chronic kidney disease between different waist and hip indices within each BMI category

**Figure S12.** Comparison on area under curves for diagnosing diabetic mellitus between different waist and hip indices within each BMI category

**Figure S13.** Body roundness index chart for high risk CVDRFs identification among male

**Figure S14.** Body roundness index chart for high risk CVDRFs identification among female

Table S1. Optimal BMI-specific BRI, WHtR and WHR thresholds for identifying participants with CVD associated risk factor among Chinese

| Risk factor            | Underweight |             |             |        | Normal weight |             |             |        | Overweight |             |             |        | Obese   |             |             |        |
|------------------------|-------------|-------------|-------------|--------|---------------|-------------|-------------|--------|------------|-------------|-------------|--------|---------|-------------|-------------|--------|
|                        | Cut-off     | Sensitivity | Specificity | Youden | Cut-off       | Sensitivity | Specificity | Youden | Cut-off    | Sensitivity | Specificity | Youden | Cut-off | Sensitivity | Specificity | Youden |
| Index=BRI              |             |             |             |        |               |             |             |        |            |             |             |        |         |             |             |        |
| Female                 |             |             |             |        |               |             |             |        |            |             |             |        |         |             |             |        |
| Hypercholesterolemia   | 1.9         | 58.6        | 60.9        | 0.195  | 2.8           | 56.8        | 60.7        | 0.174  | 3.9        | 57.6        | 51.1        | 0.088  | 5.3     | 51.6        | 54.0        | 0.056  |
| Hypertriglyceridemia   | 1.9         | 61.6        | 60.8        | 0.224  | 2.8           | 67.8        | 62.4        | 0.302  | 3.9        | 59.8        | 53.6        | 0.134  | 5.2     | 53.1        | 51.2        | 0.043  |
| Mixed hyperlipidemia   | 2.0         | 71.9        | 69.9        | 0.418  | 2.9           | 70.4        | 66.3        | 0.367  | 4.0        | 62.7        | 57.6        | 0.203  | 5.3     | 57.8        | 55.1        | 0.129  |
| Dyslipidemia           | 1.9         | 61.4        | 61.6        | 0.231  | 2.8           | 65.6        | 65.1        | 0.307  | 3.9        | 61.1        | 57.6        | 0.187  | 5.2     | 55.4        | 55.0        | 0.104  |
| Hypertension           | 2.0         | 59.0        | 71.0        | 0.300  | 2.9           | 68.7        | 68.3        | 0.370  | 4.0        | 64.9        | 61.8        | 0.267  | 5.2     | 62.8        | 56.9        | 0.197  |
| Diabetic Mellitus      | 1.9         | 66.3        | 70.1        | 0.364  | 3.0           | 72.4        | 71.1        | 0.435  | 4.2        | 64.6        | 68.0        | 0.327  | 5.4     | 63.8        | 60.3        | 0.241  |
| Chronic kidney disease | 1.9         | 58.6        | 69.9        | 0.285  | 3.1           | 66.4        | 75.2        | 0.416  | 4.2        | 68.3        | 66.5        | 0.348  | 5.6     | 60.0        | 65.8        | 0.258  |
| With at least one risk | 1.8         | 61.9        | 62.4        | 0.243  | 2.8           | 66.1        | 67.2        | 0.334  | 3.9        | 62.4        | 63.0        | 0.254  | 5.0     | 65.3        | 55.4        | 0.207  |
| Male                   |             |             |             |        |               |             |             |        |            |             |             |        |         |             |             |        |
| Hypercholesterolemia   | 1.8         | 58.6        | 61.3        | 0.200  | 3.0           | 51.4        | 56.8        | 0.082  | 3.9        | 51.8        | 51.8        | 0.036  | 4.9     | 57.8        | 48.0        | 0.058  |
| Hypertriglyceridemia   | 1.8         | 57.4        | 61.9        | 0.193  | 2.9           | 65.2        | 54.7        | 0.199  | 3.9        | 51.6        | 54.1        | 0.057  | 4.9     | 53.0        | 48.8        | 0.018  |
| Mixed hyperlipidemia   | 1.8         | 65.7        | 60.9        | 0.266  | 3.0           | 68.0        | 57.7        | 0.257  | 3.9        | 57.5        | 52.8        | 0.103  | 4.9     | 56.0        | 48.5        | 0.045  |
| Dyslipidemia           | 1.8         | 58.4        | 62.9        | 0.213  | 2.9           | 65.7        | 57.7        | 0.234  | 3.8        | 59.9        | 50.7        | 0.106  | 4.9     | 53.8        | 51.8        | 0.056  |
| Hypertension           | 1.8         | 60.9        | 63.0        | 0.238  | 3.0           | 63.7        | 60.4        | 0.241  | 3.9        | 61.7        | 56.7        | 0.184  | 5.0     | 55.6        | 59.2        | 0.148  |
| Diabetic Mellitus      | 1.8         | 65.5        | 61.3        | 0.268  | 3.1           | 64.6        | 64.7        | 0.293  | 4.0        | 61.9        | 60.5        | 0.224  | 5.1     | 57.8        | 60.9        | 0.187  |
| Chronic kidney disease | 1.8         | 65.8        | 61.5        | 0.273  | 3.2           | 58.2        | 69.8        | 0.280  | 4.1        | 62.2        | 65.3        | 0.276  | 5.2     | 60.3        | 64.3        | 0.246  |
| With at least one risk | 1.8         | 58.4        | 65.6        | 0.239  | 2.9           | 65.3        | 62.4        | 0.276  | 3.8        | 61.0        | 57.5        | 0.186  | 4.8     | 60.2        | 54.2        | 0.144  |
| Index=WHtR             |             |             |             |        |               |             |             |        |            |             |             |        |         |             |             |        |
| Female                 |             |             |             |        |               |             |             |        |            |             |             |        |         |             |             |        |

|                        |      |      |      |       |      |      |      |       |      |      |      |       |      |      |      |       |
|------------------------|------|------|------|-------|------|------|------|-------|------|------|------|-------|------|------|------|-------|
| Hypercholesterolemia   | 0.41 | 58.6 | 60.9 | 0.195 | 0.47 | 58.3 | 59.4 | 0.177 | 0.53 | 58.1 | 50.6 | 0.086 | 0.59 | 57.7 | 48.0 | 0.057 |
| Hypertriglyceridemia   | 0.41 | 61.6 | 60.8 | 0.224 | 0.47 | 69.1 | 61.2 | 0.303 | 0.53 | 60.3 | 53.0 | 0.133 | 0.59 | 55.1 | 48.9 | 0.040 |
| Mixed hyperlipidemia   | 0.42 | 66.7 | 74.2 | 0.409 | 0.48 | 67.2 | 68.9 | 0.361 | 0.54 | 58.0 | 62.1 | 0.201 | 0.59 | 64.9 | 49.2 | 0.141 |
| Dyslipidemia           | 0.41 | 61.4 | 61.6 | 0.230 | 0.47 | 67.0 | 63.9 | 0.309 | 0.53 | 61.6 | 57.0 | 0.187 | 0.59 | 57.7 | 52.9 | 0.105 |
| Hypertension           | 0.42 | 67.1 | 61.7 | 0.288 | 0.48 | 65.9 | 70.9 | 0.368 | 0.54 | 60.1 | 66.3 | 0.264 | 0.59 | 65.3 | 54.8 | 0.200 |
| Diabetic Mellitus      | 0.42 | 63.2 | 74.4 | 0.376 | 0.48 | 75.0 | 68.7 | 0.436 | 0.54 | 70.3 | 62.5 | 0.328 | 0.60 | 65.0 | 59.0 | 0.240 |
| Chronic kidney disease | 0.41 | 65.5 | 60.5 | 0.260 | 0.49 | 64.9 | 76.5 | 0.414 | 0.55 | 63.6 | 70.8 | 0.344 | 0.61 | 60.5 | 65.4 | 0.259 |
| With at least one risk | 0.41 | 61.9 | 62.3 | 0.243 | 0.47 | 67.4 | 66.0 | 0.334 | 0.53 | 63.0 | 62.4 | 0.253 | 0.59 | 59.3 | 60.9 | 0.202 |
| Male                   |      |      |      |       |      |      |      |       |      |      |      |       |      |      |      |       |
| Hypercholesterolemia   | 0.41 | 58.6 | 61.3 | 0.199 | 0.48 | 54.5 | 53.4 | 0.079 | 0.53 | 52.7 | 51.0 | 0.037 | 0.58 | 55.9 | 49.6 | 0.055 |
| Hypertriglyceridemia   | 0.41 | 57.4 | 61.9 | 0.193 | 0.48 | 61.7 | 57.8 | 0.195 | 0.53 | 52.4 | 53.2 | 0.056 | 0.58 | 51.5 | 50.5 | 0.020 |
| Mixed hyperlipidemia   | 0.41 | 65.7 | 60.9 | 0.266 | 0.48 | 71.2 | 54.4 | 0.256 | 0.53 | 58.3 | 51.9 | 0.102 | 0.58 | 54.2 | 50.1 | 0.043 |
| Dyslipidemia           | 0.41 | 58.4 | 62.8 | 0.213 | 0.48 | 62.2 | 60.8 | 0.230 | 0.53 | 53.5 | 56.5 | 0.100 | 0.58 | 52.3 | 53.5 | 0.057 |
| Hypertension           | 0.41 | 60.9 | 62.9 | 0.238 | 0.48 | 66.9 | 57.0 | 0.239 | 0.53 | 62.6 | 55.9 | 0.184 | 0.58 | 59.8 | 55.1 | 0.149 |
| Diabetic Mellitus      | 0.41 | 65.5 | 61.3 | 0.268 | 0.49 | 62.4 | 66.6 | 0.290 | 0.54 | 55.9 | 66.1 | 0.220 | 0.59 | 55.2 | 63.3 | 0.185 |
| Chronic kidney disease | 0.41 | 65.8 | 61.5 | 0.273 | 0.49 | 61.9 | 65.5 | 0.274 | 0.54 | 62.7 | 64.7 | 0.274 | 0.59 | 62.5 | 61.3 | 0.239 |
| With at least one risk | 0.41 | 58.4 | 65.5 | 0.239 | 0.48 | 62.0 | 65.5 | 0.275 | 0.53 | 54.8 | 63.4 | 0.182 | 0.58 | 53.1 | 61.1 | 0.141 |
| Index=WHR              |      |      |      |       |      |      |      |       |      |      |      |       |      |      |      |       |
| Female                 |      |      |      |       |      |      |      |       |      |      |      |       |      |      |      |       |
| Hypercholesterolemia   | 0.76 | 62.6 | 51.5 | 0.141 | 0.81 | 61.3 | 53.8 | 0.151 | 0.87 | 52.2 | 53.2 | 0.054 | 0.90 | 53.0 | 48.1 | 0.011 |
| Hypertriglyceridemia   | 0.77 | 60.3 | 61.7 | 0.219 | 0.83 | 68.7 | 62.0 | 0.307 | 0.87 | 60.3 | 56.8 | 0.171 | 0.91 | 51.1 | 59.1 | 0.102 |
| Mixed hyperlipidemia   | 0.78 | 70.2 | 69.0 | 0.392 | 0.84 | 68.7 | 67.0 | 0.357 | 0.87 | 65.4 | 54.4 | 0.199 | 0.90 | 63.5 | 49.5 | 0.13  |
| Dyslipidemia           | 0.77 | 56.5 | 62.2 | 0.187 | 0.83 | 65.3 | 64.5 | 0.298 | 0.87 | 59.9 | 60.6 | 0.205 | 0.90 | 58.8 | 54.8 | 0.136 |
| Hypertension           | 0.77 | 64.7 | 62.3 | 0.270 | 0.83 | 65.4 | 68.7 | 0.341 | 0.88 | 59.8 | 65.0 | 0.248 | 0.90 | 64.5 | 55.0 | 0.195 |
| Diabetic Mellitus      | 0.77 | 73.7 | 61.5 | 0.352 | 0.84 | 71.3 | 72.5 | 0.438 | 0.89 | 65.0 | 68.4 | 0.335 | 0.92 | 58.6 | 64.5 | 0.231 |
| Chronic kidney disease | 0.78 | 58.6 | 69.1 | 0.277 | 0.83 | 71.1 | 66.2 | 0.374 | 0.89 | 65.5 | 66.8 | 0.323 | 0.91 | 64   | 56.3 | 0.203 |

|                        |      |      |      |       |      |      |      |       |      |      |      |       |      |      |      |       |
|------------------------|------|------|------|-------|------|------|------|-------|------|------|------|-------|------|------|------|-------|
| With at least one risk | 0.77 | 58.2 | 62.9 | 0.211 | 0.82 | 65.5 | 66.5 | 0.320 | 0.87 | 60.2 | 65.4 | 0.257 | 0.90 | 59.3 | 62.1 | 0.214 |
| Male                   |      |      |      |       |      |      |      |       |      |      |      |       |      |      |      |       |
| Hypercholesterolemia   | 0.81 | 49.6 | 61.3 | 0.109 | 0.87 | 57.8 | 49.0 | 0.069 | 0.92 | 49.3 | 52.5 | 0.018 | 0.95 | 51.3 | 48.8 | 0.001 |
| Hypertriglyceridemia   | 0.81 | 56.7 | 62.2 | 0.188 | 0.88 | 58.7 | 60.7 | 0.194 | 0.92 | 51.9 | 55.5 | 0.074 | 0.95 | 52.9 | 50.7 | 0.036 |
| Mixed hyperlipidemia   | 0.82 | 74.3 | 68.7 | 0.430 | 0.88 | 67.2 | 57.3 | 0.244 | 0.92 | 58.2 | 53.6 | 0.118 | 0.95 | 56.5 | 49.7 | 0.062 |
| Dyslipidemia           | 0.81 | 56.0 | 62.9 | 0.189 | 0.88 | 58.9 | 63.5 | 0.224 | 0.91 | 62   | 50.7 | 0.127 | 0.95 | 53.6 | 54.5 | 0.081 |
| Hypertension           | 0.80 | 61.7 | 52.3 | 0.139 | 0.88 | 62.9 | 59.8 | 0.226 | 0.92 | 60.8 | 57.3 | 0.182 | 0.95 | 59.9 | 54.2 | 0.141 |
| Diabetic Mellitus      | 0.81 | 57.5 | 61.4 | 0.189 | 0.89 | 68.4 | 65.9 | 0.343 | 0.93 | 63.4 | 63.0 | 0.265 | 0.96 | 60.1 | 60.4 | 0.205 |
| Chronic kidney disease | 0.80 | 68.4 | 51.4 | 0.198 | 0.89 | 58.2 | 64.4 | 0.226 | 0.93 | 61.9 | 61.2 | 0.231 | 0.96 | 58.5 | 58.1 | 0.166 |
| With at least one risk | 0.81 | 52.6 | 64.5 | 0.171 | 0.87 | 66.1 | 60.9 | 0.271 | 0.91 | 62.9 | 57.7 | 0.205 | 0.95 | 54.1 | 62.1 | 0.162 |

Abbreviation: BRI, body round index; WHtR, waist height ratio; WHR, waist hip ratio.

Table S2. Odds ratios for high BRI, high WHtR and high WHR and with at least one CVD risk factors by age stratification

| Age strata         | Male                     |                          |                          |                          | Female                   |                          |                          |                          |
|--------------------|--------------------------|--------------------------|--------------------------|--------------------------|--------------------------|--------------------------|--------------------------|--------------------------|
|                    | Underweight              | Normal weight            | Overweight               | Obese                    | Underweight              | Normal weight            | Overweight               | Obese                    |
| Index=BRI          | High-BRI $\geq 1.8$      | High-BRI $\geq 3.0$      | High-BRI $\geq 3.9$      | High-BRI $\geq 5.0$      | High-BRI $\geq 1.9$      | High-BRI $\geq 2.9$      | High-BRI $\geq 4.0$      | High-BRI $\geq 5.2$      |
| <40 years          | 1.90(1.47,2.46)          | 2.86(2.74,2.98)          | 2.10(2.02,2.18)          | 1.79(1.66,1.93)          | 1.41(1.15,1.74)          | 2.63(2.50,2.77)          | 2.05(1.90,2.21)          | 1.91(1.65,2.20)          |
| 40-59 years        | 1.79(1.52,2.11)          | 2.35(2.29,2.42)          | 1.70(1.66,1.75)          | 1.57(1.48,1.66)          | 1.47(1.26,1.70)          | 2.24(2.17,2.30)          | 1.85(1.77,1.92)          | 1.66(1.52,1.82)          |
| $\geq 60$ years    | 1.68(1.32,2.14)          | 1.93(1.83,2.04)          | 1.38(1.31,1.46)          | 1.38(1.22,1.55)          | 1.52(1.17,1.98)          | 1.90(1.79,2.02)          | 1.66(1.54,1.80)          | 1.45(1.21,1.73)          |
| <i>P</i> interact* | 0.526                    | <0.001                   | <0.001                   | 0.002                    | 0.695                    | <0.001                   | 0.002                    | 0.042                    |
| Index=WHtR         | High-WHtR<br>$\geq 0.41$ | High-WHtR<br>$\geq 0.48$ | High-WHtR<br>$\geq 0.53$ | High-WHtR<br>$\geq 0.58$ | High-WHtR<br>$\geq 0.41$ | High-WHtR<br>$\geq 0.48$ | High-WHtR<br>$\geq 0.54$ | High-WHtR<br>$\geq 0.59$ |
| <40 years          | 1.89(1.46,2.45)          | 2.86(2.75,2.98)          | 2.09(2.01,2.17)          | 1.74(1.61,1.87)          | 1.49(1.22,1.81)          | 2.67(2.54,2.81)          | 2.07(1.92,2.24)          | 1.90(1.65,2.19)          |
| 40-59 years        | 1.79(1.52,2.10)          | 2.37(2.31,2.44)          | 1.70(1.65,1.74)          | 1.58(1.49,1.67)          | 1.49(1.28,1.74)          | 2.24(2.18,2.31)          | 1.83(1.75,1.90)          | 1.67(1.53,1.83)          |
| $\geq 60$ years    | 1.68(1.32,2.15)          | 1.97(1.87,2.07)          | 1.38(1.31,1.46)          | 1.44(1.27,1.62)          | 1.50(1.13,1.98)          | 1.88(1.77,1.99)          | 1.61(1.49,1.74)          | 1.47(1.23,1.76)          |
| <i>P</i> interact* | 0.541                    | <0.001                   | <0.001                   | 0.023                    | 0.977                    | <0.001                   | <0.001                   | 0.061                    |
| Index=WHR          | High-WHR<br>$\geq 0.81$  | High-WHR<br>$\geq 0.88$  | High-WHR<br>$\geq 0.92$  | High-WHR<br>$\geq 0.95$  | High-WHR<br>$\geq 0.77$  | High-WHR<br>$\geq 0.83$  | High-WHR<br>$\geq 0.88$  | High-WHR<br>$\geq 0.90$  |
| <40 years          | 1.91(1.48,2.46)          | 2.89(2.77,3.01)          | 2.29(2.20,2.38)          | 2.07(1.92,2.23)          | 1.40(1.15,1.71)          | 2.54(2.41,2.67)          | 2.43(2.25,2.62)          | 2.19(1.90,2.52)          |
| 40-59 years        | 1.63(1.39,1.91)          | 2.34(2.27,2.40)          | 1.86(1.81,1.91)          | 1.67(1.58,1.77)          | 1.57(1.35,1.82)          | 2.24(2.18,2.31)          | 1.99(1.92,2.08)          | 1.87(1.71,2.04)          |
| $\geq 60$ years    | 1.39(1.10,1.76)          | 1.89(1.79,1.99)          | 1.51(1.43,1.59)          | 1.35(1.20,1.53)          | 1.76(1.35,2.30)          | 1.98(1.87,2.10)          | 1.64(1.51,1.77)          | 1.59(1.34,1.90)          |
| <i>P</i> interact* | 0.097                    | <0.001                   | <0.001                   | <0.001                   | 0.223                    | <0.001                   | <0.001                   | 0.019                    |

\**P* interact: *p* value for statistical interaction on a multiplicative scale, derived from a likelihood ratio test comparing a model including the cross-classification anthropometric indices by-BMI-by-age group with a model including separate variables for anthropometric indices-by-BMI and age; Abbreviation: BRI, body round index; WHtR, waist height ratio; WHR, waist hip ratio;

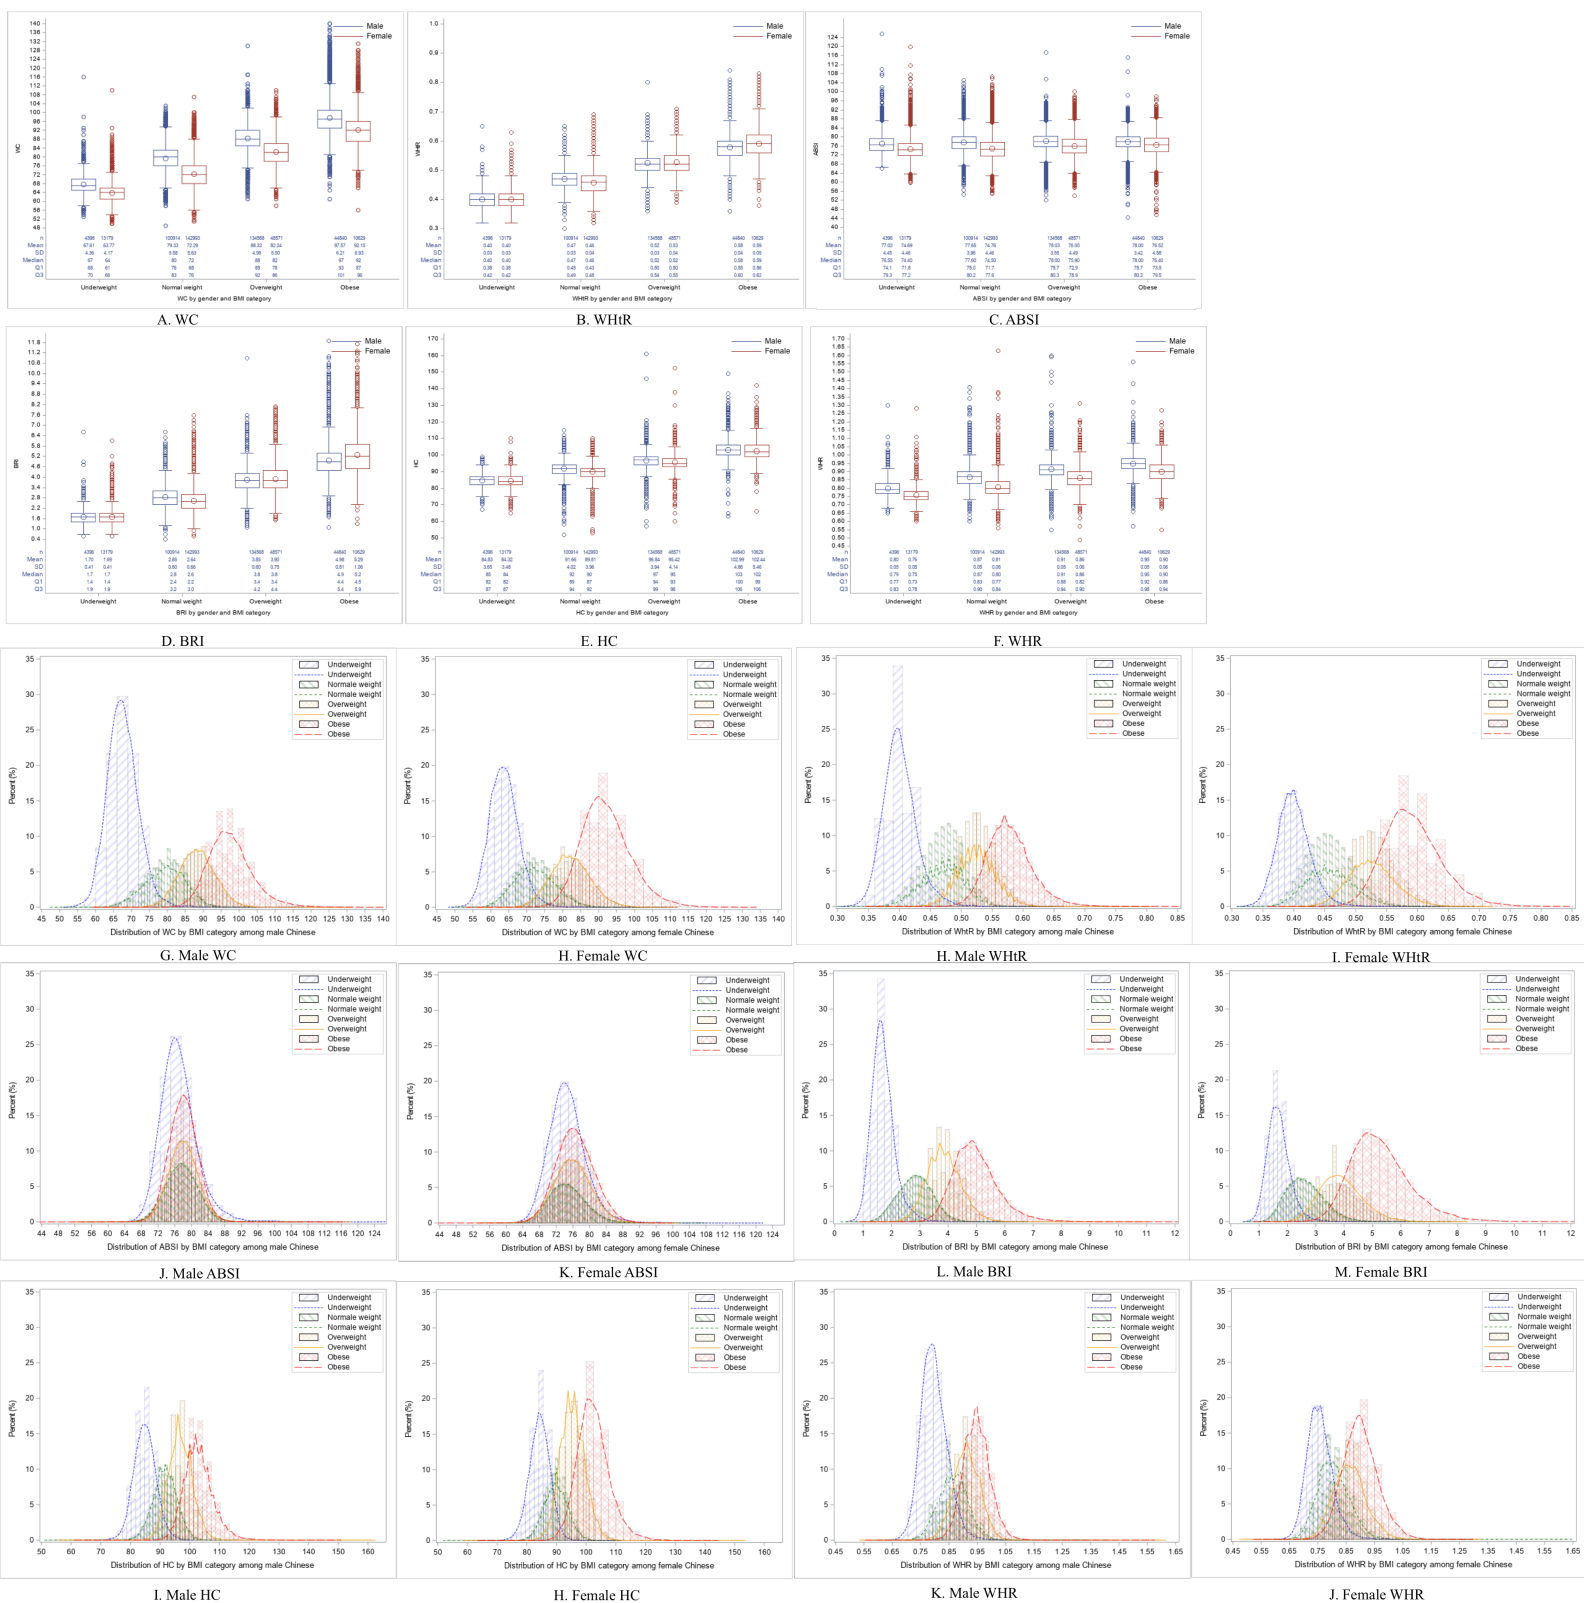

Figure S1. Distribution of anthropometric indices by gender and BMI category among Hunan Chinese

A-F: Boxplot showing the distribution of anthropometric indices by gender and BMI category ; G-J: kernel density estimates (KDE) using Gaussian kernels to display anthropometric indices distribution overlaps between different BMI categories ; Abbreviation: n, number of persons; SD, standard deviation; Q1, first quartile, the 25<sup>th</sup> percentile; Q3, third quartile, the 75<sup>th</sup> percentile; BMI, body mass index; WC, waist circumference; WHtR, waist height ratio; ABSI, a body shape index; BRI, body round index; HC, hip circumference; WHR, waist hip ratio.

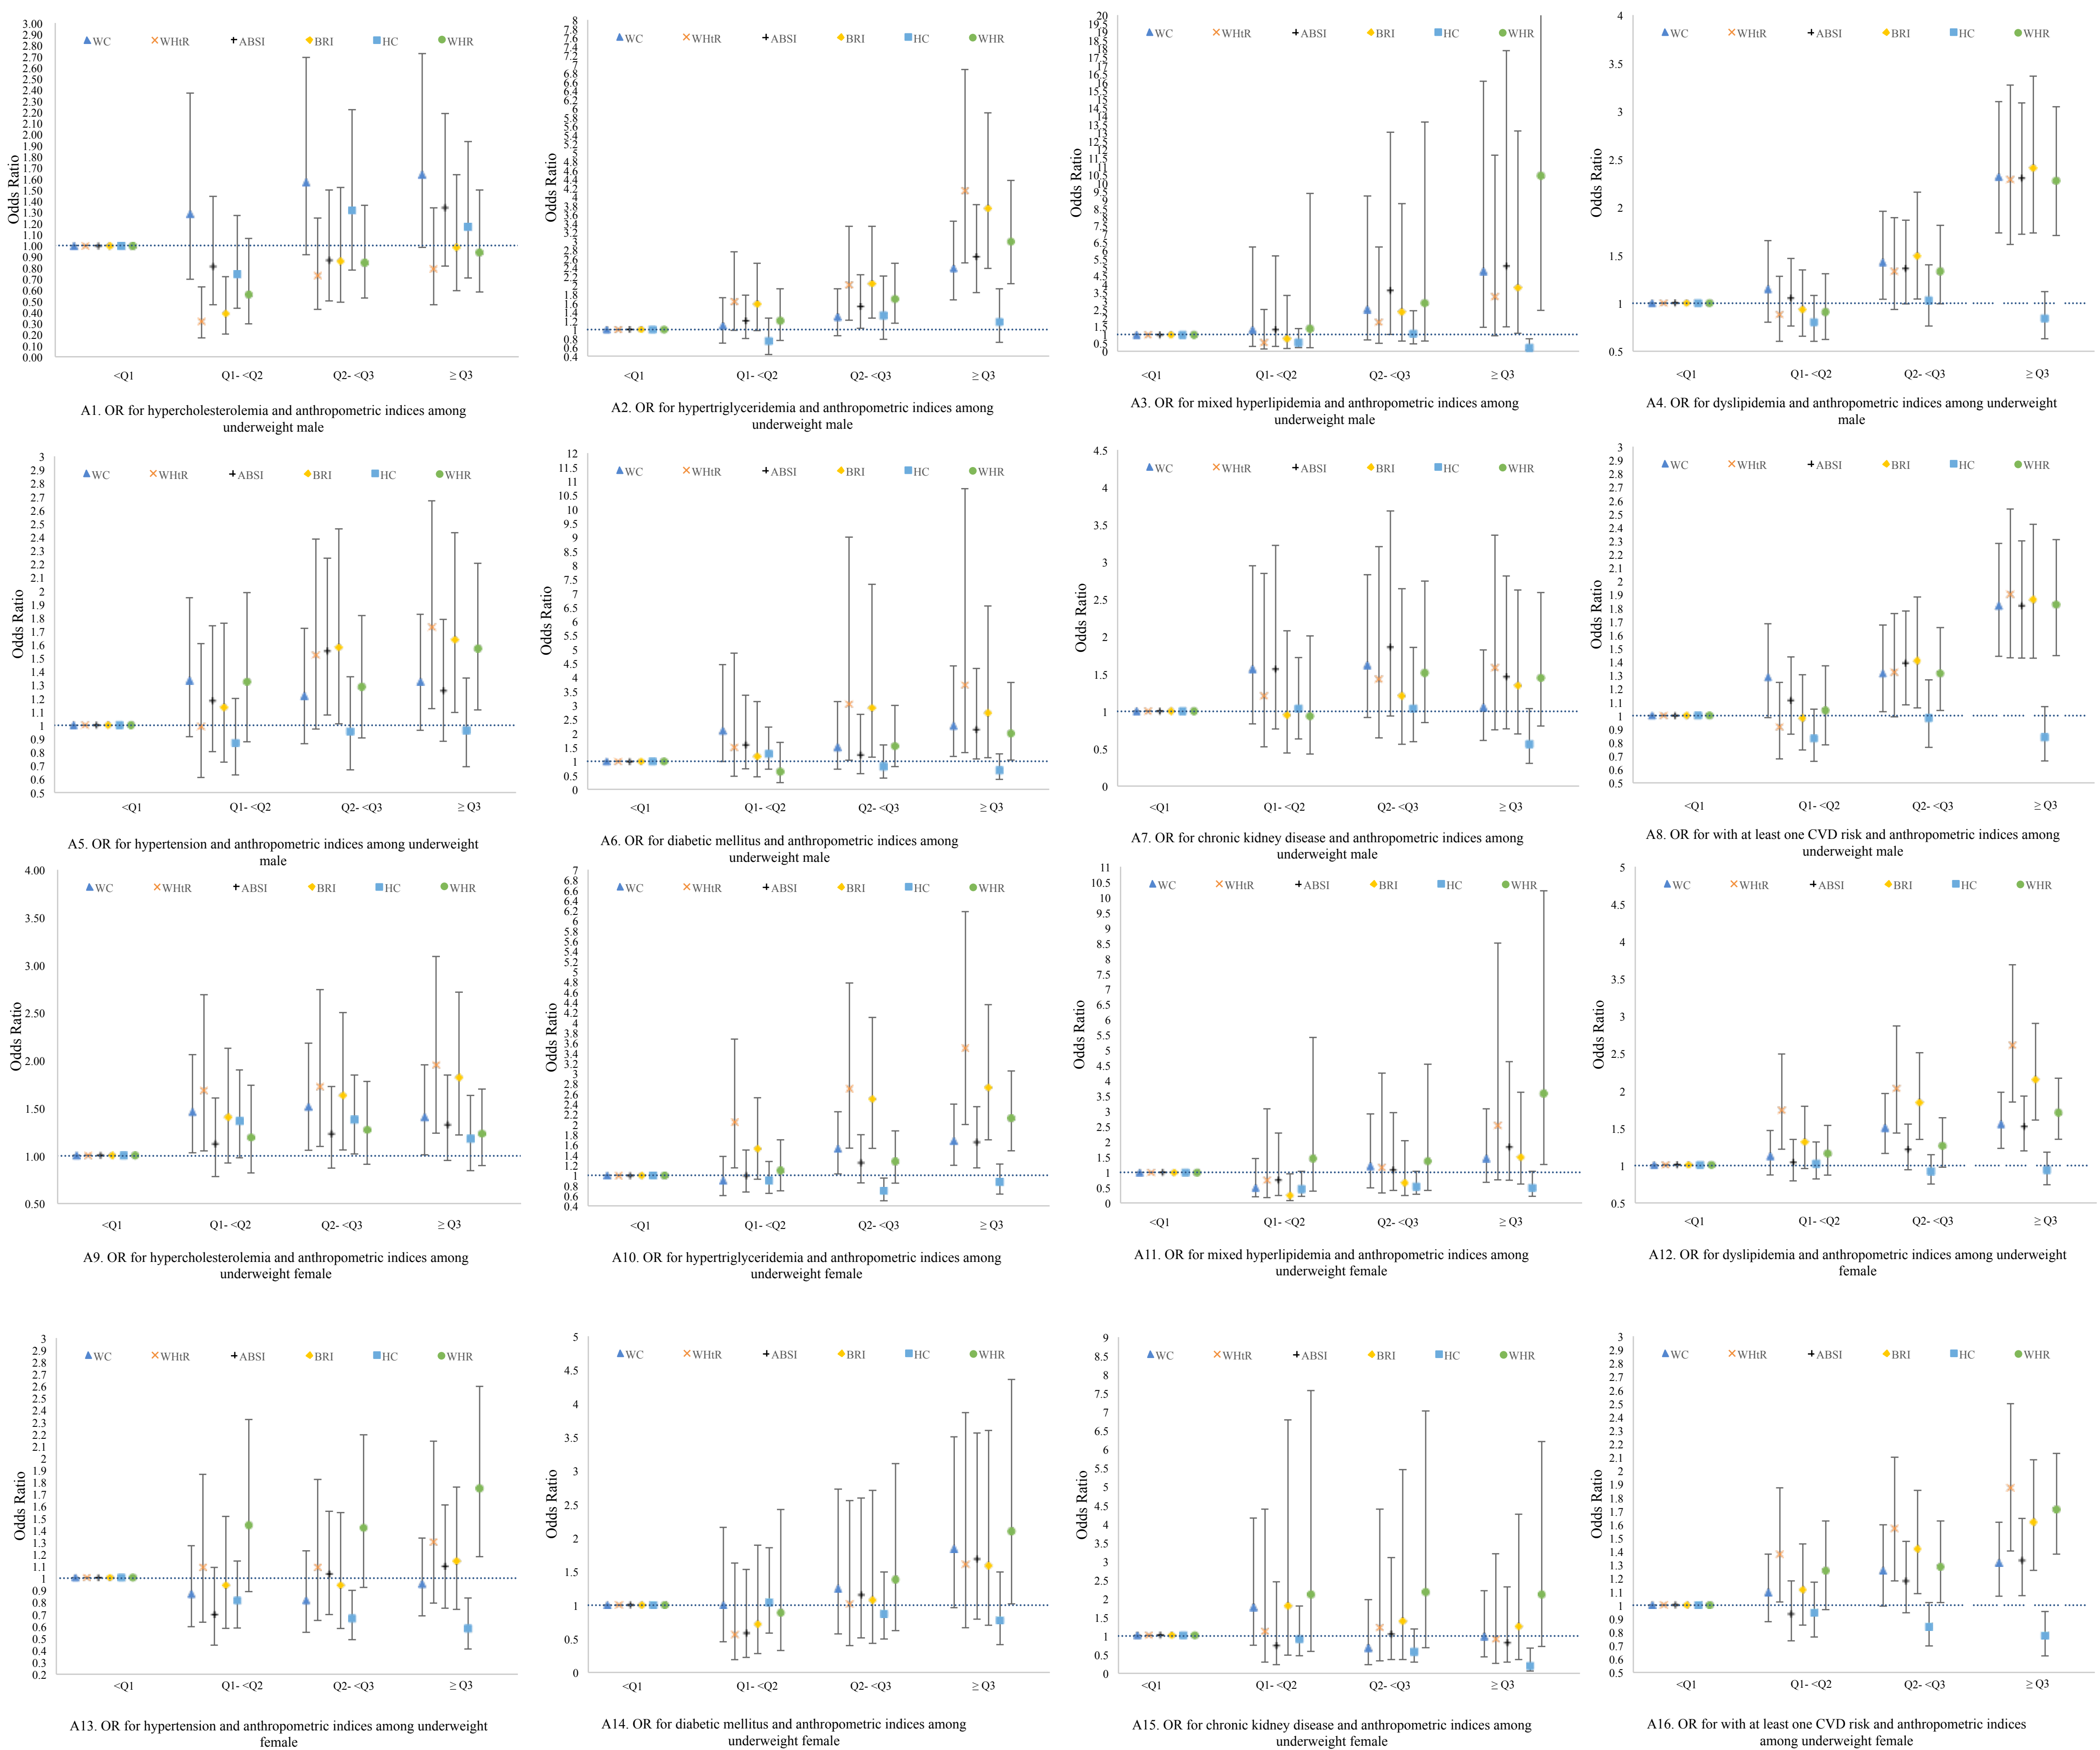

Figure S2. Association between CVD risk factors and anthropometric indices among underweight Chinese



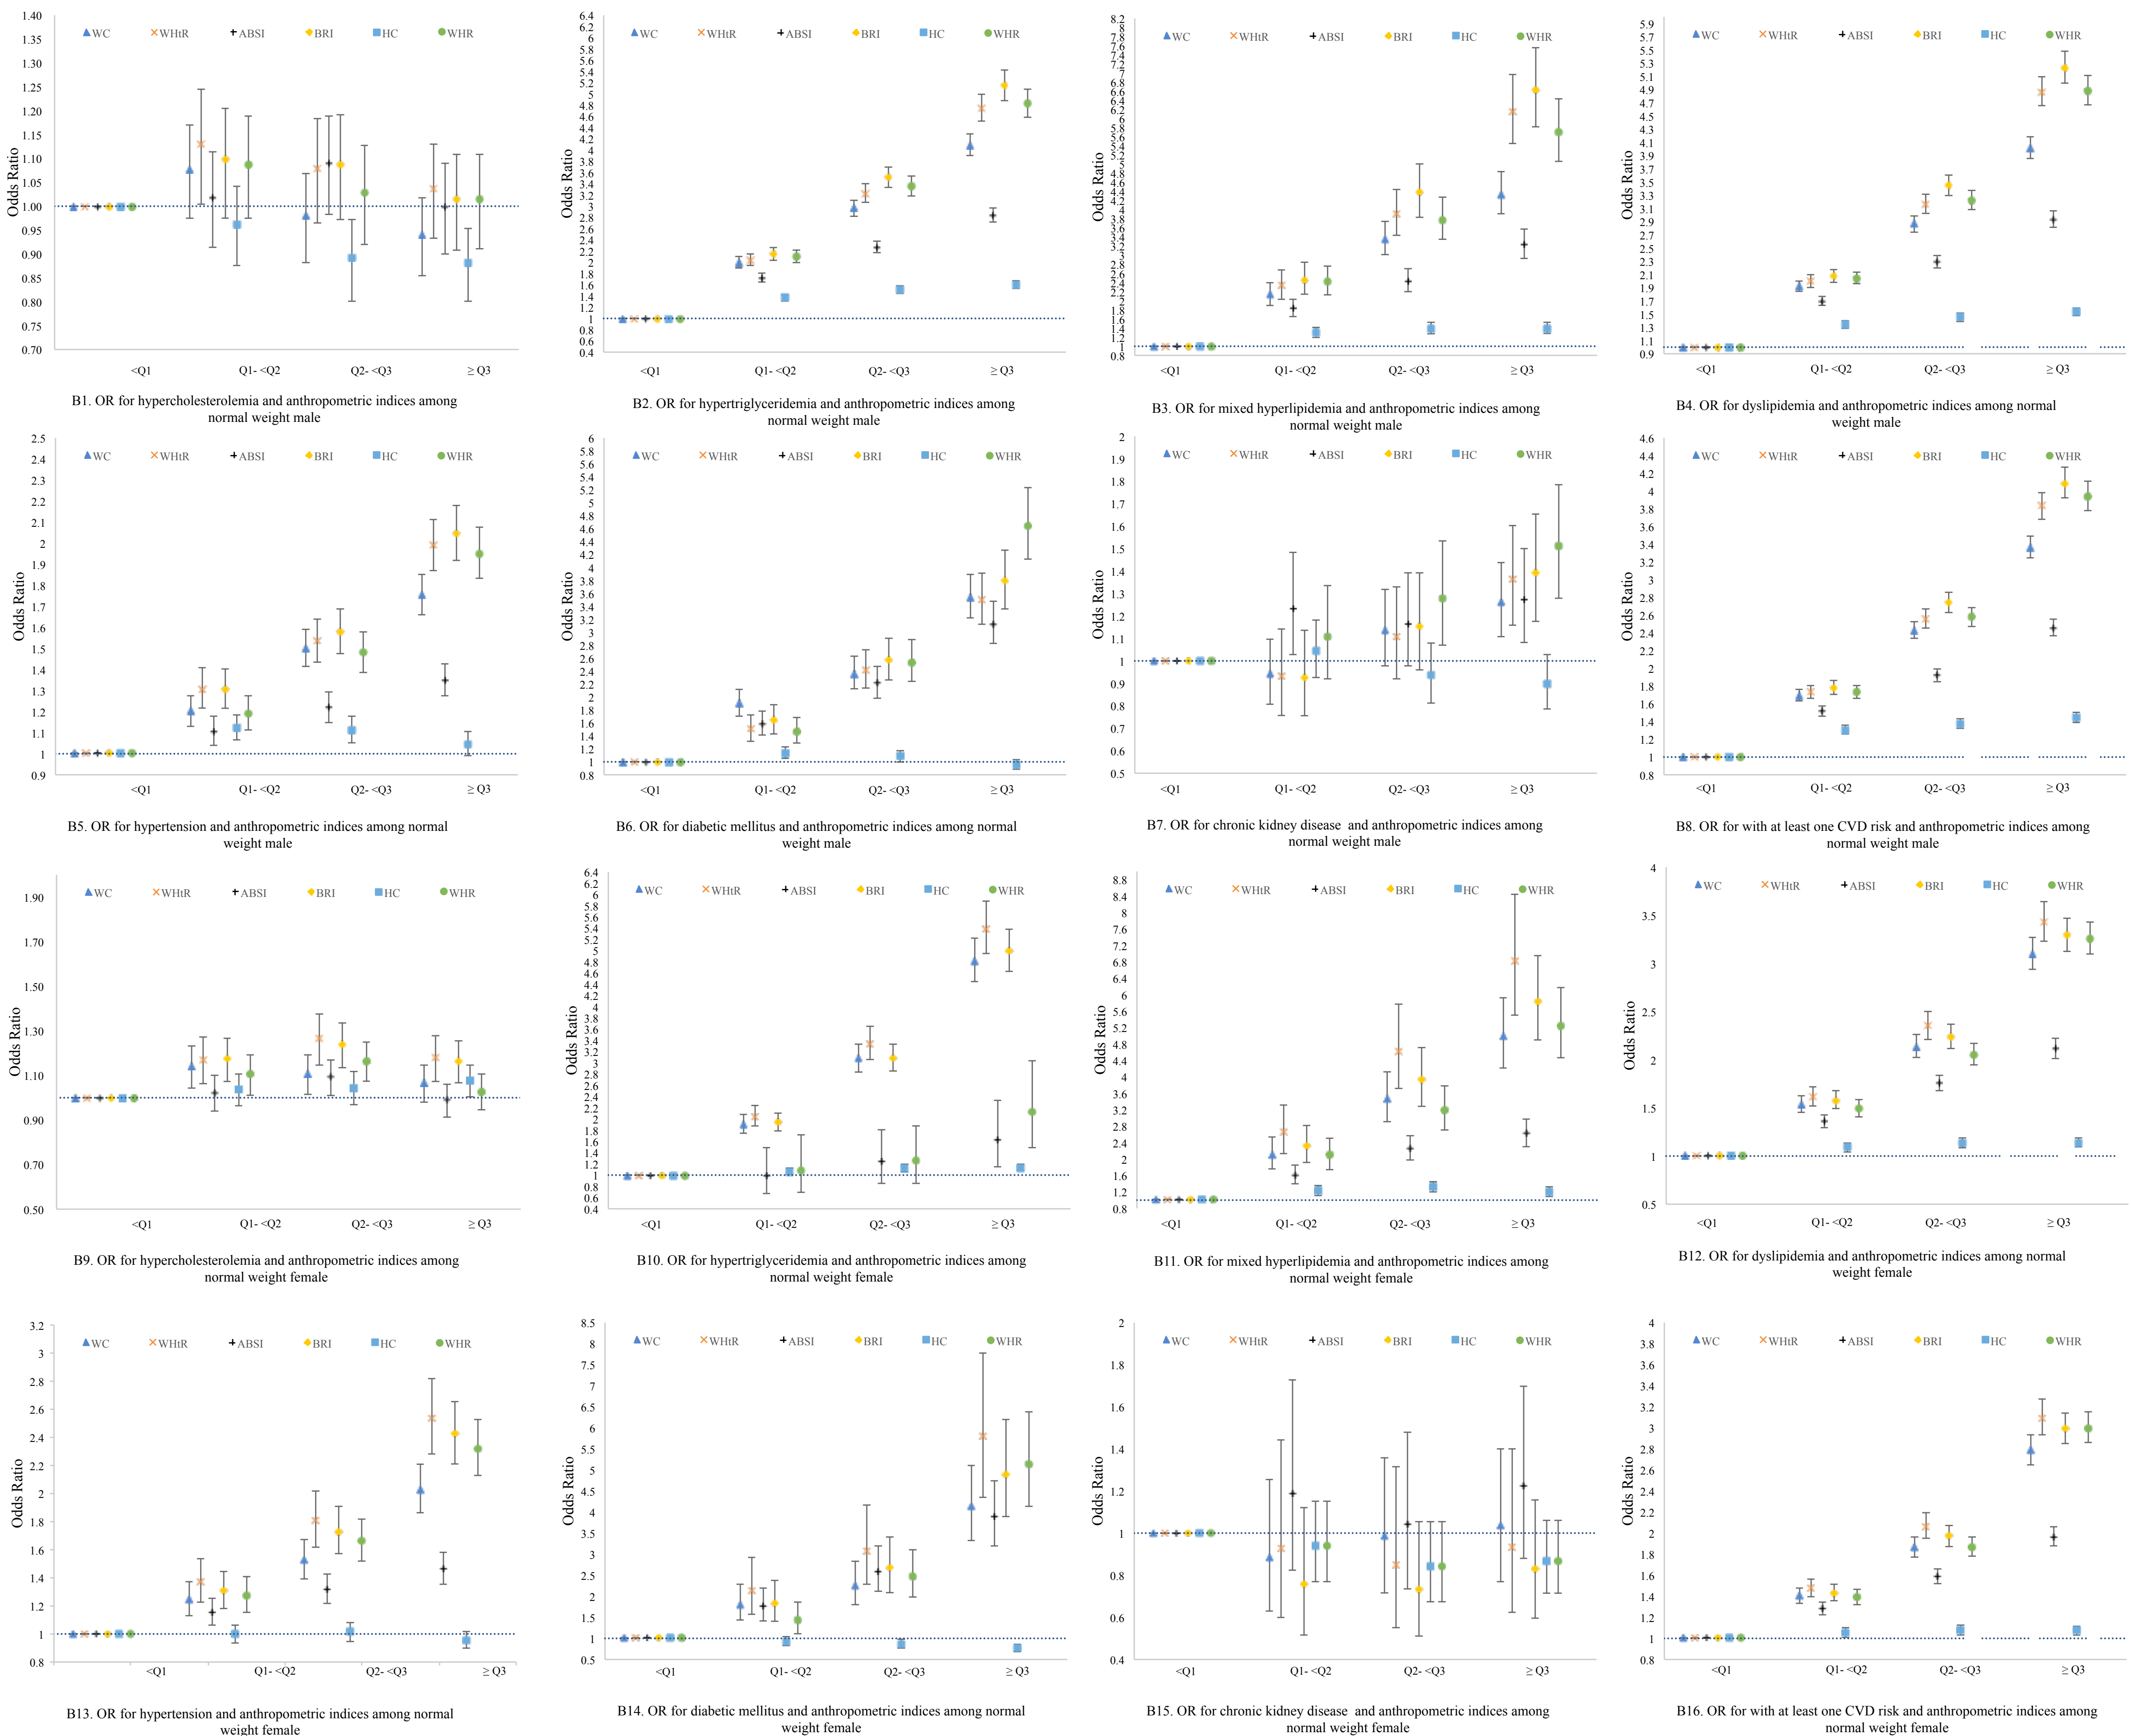

Figure S3. Association between CVD risk factors and anthropometric indices among normal weight Chinese \*

\* association was adjusted for age, smoking, and drinking status and index at <Q1 level was treated as non-exposed;

Abbreviation: Q1, first quartile, the 25<sup>th</sup> percentile; Q2: second quartile, median; Q3, third quartile, the 75<sup>th</sup> percentile; WC, waist circumference; WHtR, waist height ratio; ABSI, a body shape index; BRI, body round index; HC, hip circumference; WHR, waist hip ratio.



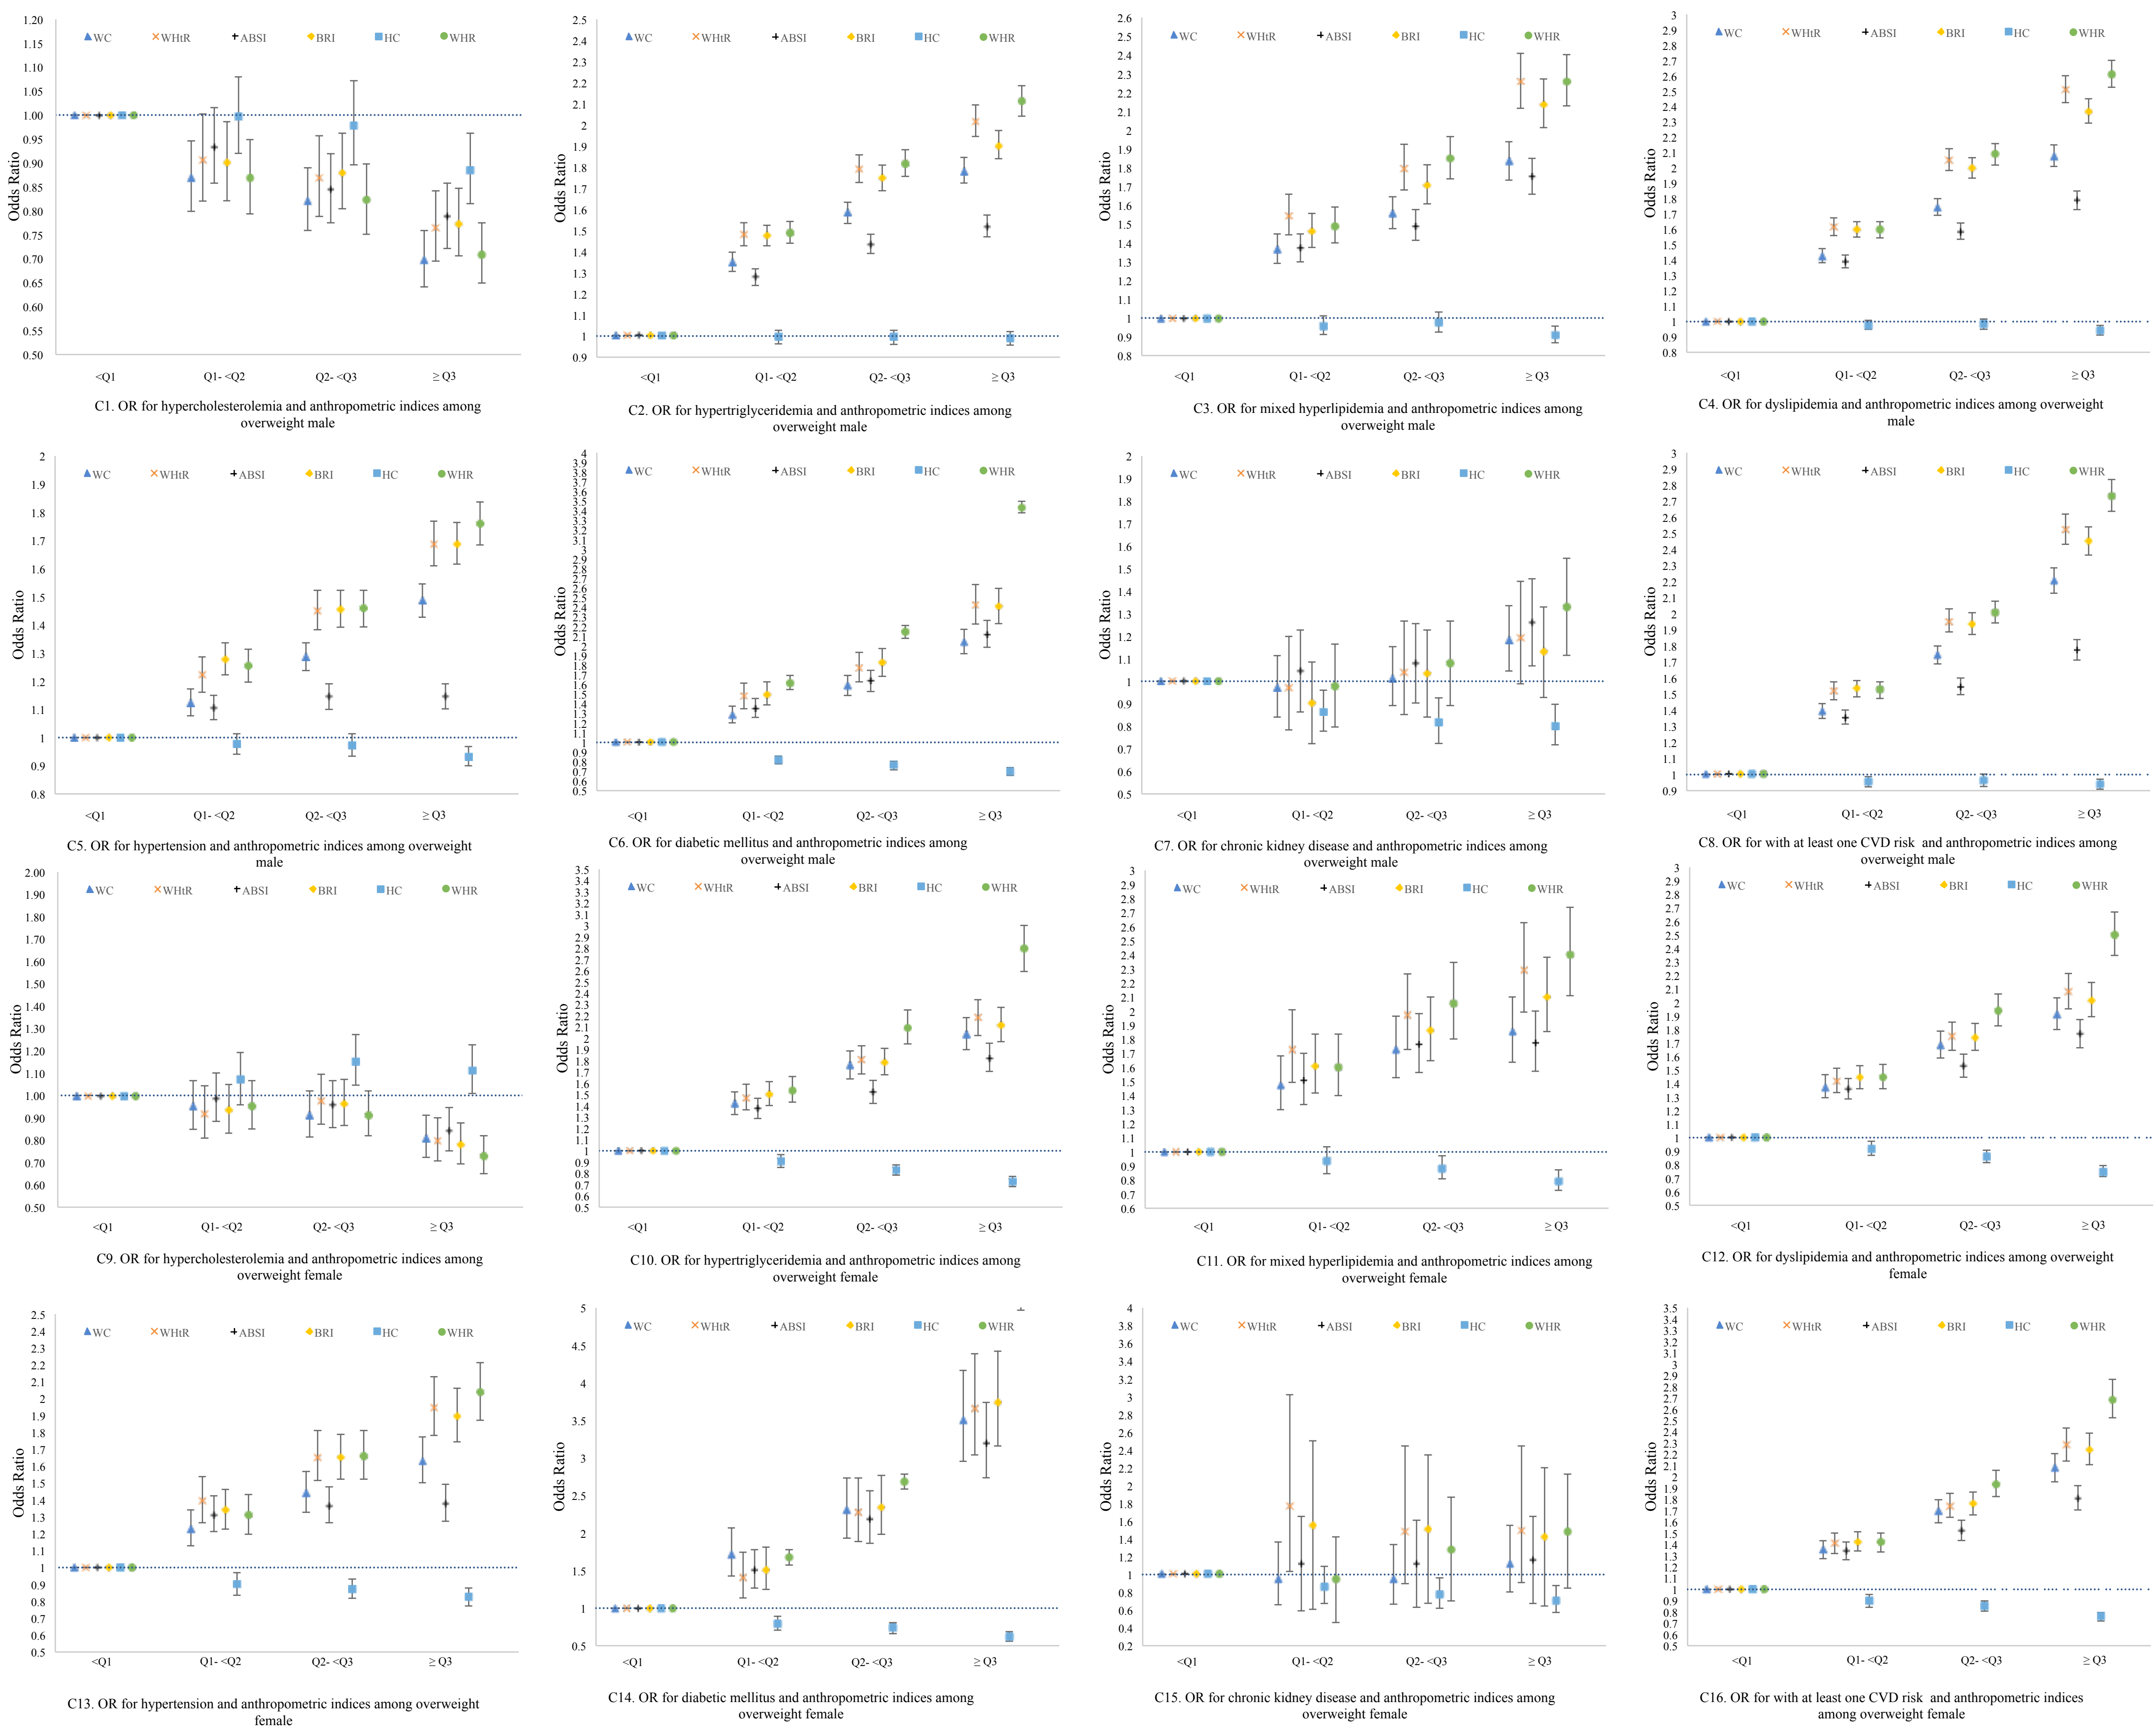

Figure S4. Association between CVD risk factors and anthropometric indices among overweight Chinese \*

\* association was adjusted for age, smoking, and drinking status and index at <Q1 level was treated as non-exposed;  
 Abbreviation: Q1, first quartile, the 25<sup>th</sup> percentile; Q2: second quartile, median; Q3, third quartile, the 75<sup>th</sup> percentile; WC, waist circumference; WHtR, waist height ratio; ABSI, a body shape index; BRI, body round index; HC, hip circumference; WHR, waist hip ratio.

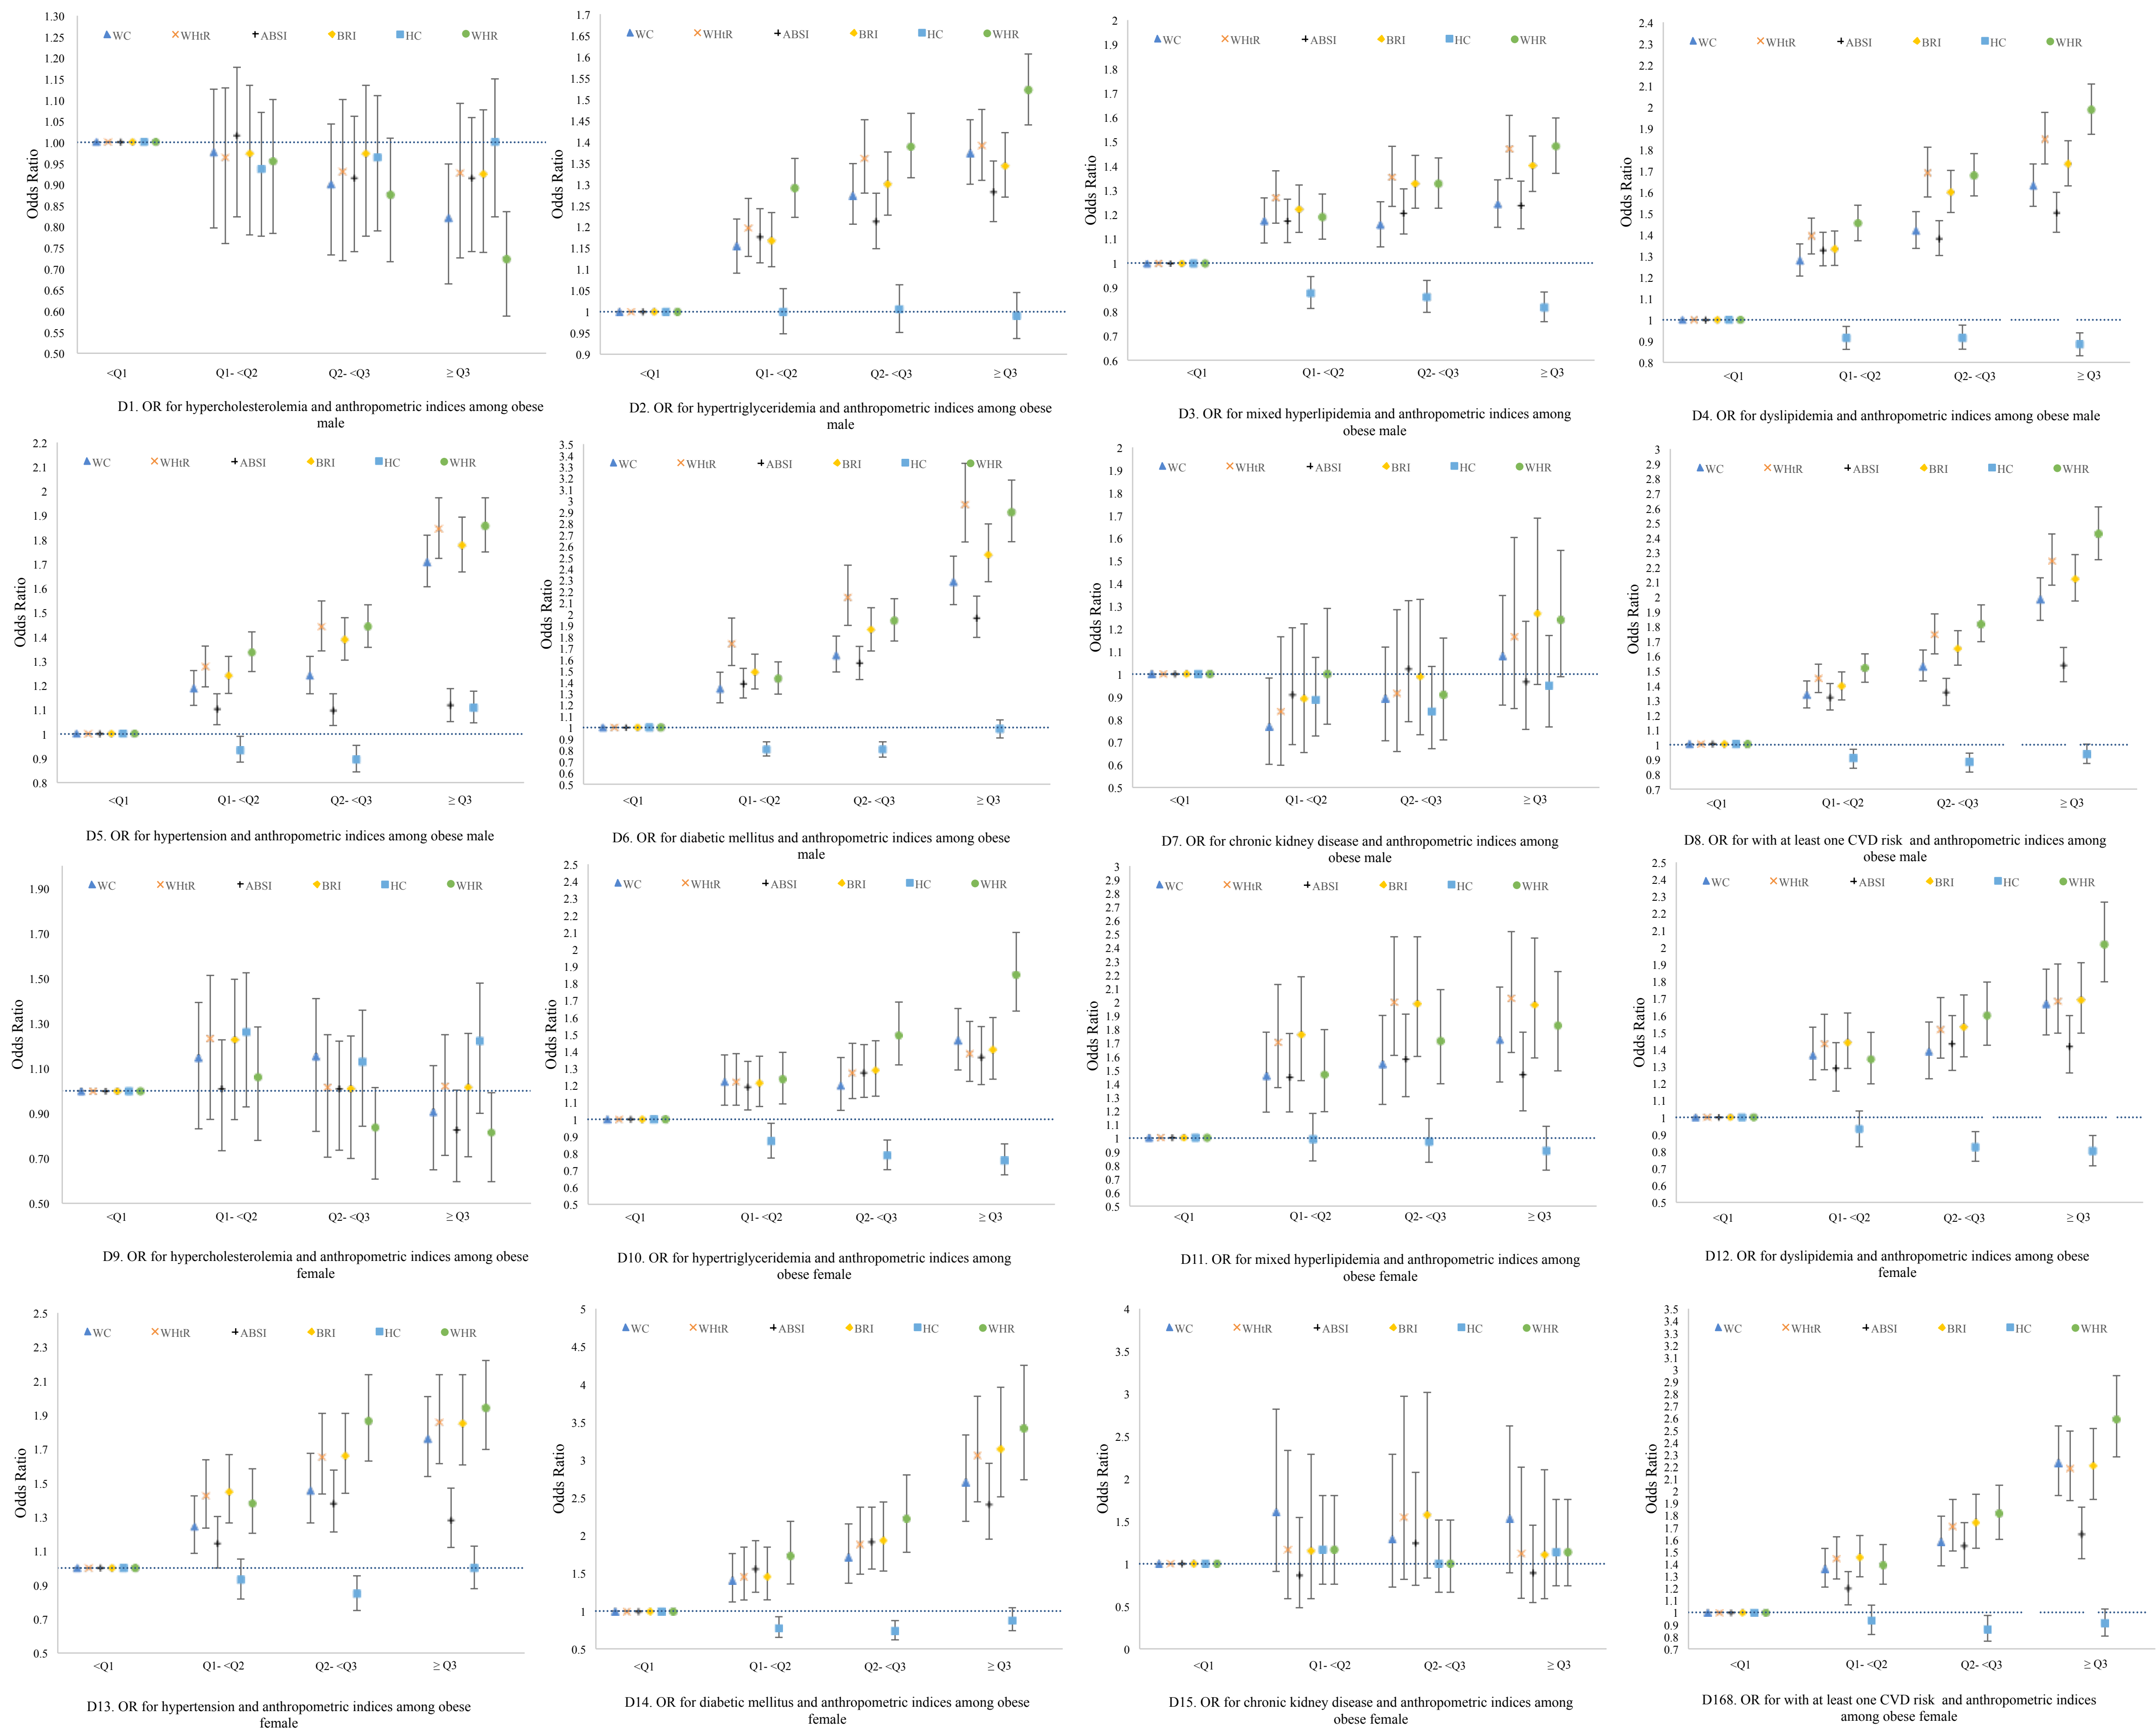

Figure S5. Association between CVD risk factors and anthropometric indices among obese Chinese \*

\* association was adjusted for age, smoking, and drinking status and index at <Q1 level was treated as non-exposed;  
 Abbreviation: Q1, first quartile, the 25<sup>th</sup> percentile; Q2: second quartile, median; Q3, third quartile, the 75<sup>th</sup> percentile; WC, waist circumference; WHtR, waist height ratio; ABSI, a body shape index; BRI, body round index; HC, hip circumference; WHR, waist hip ratio.

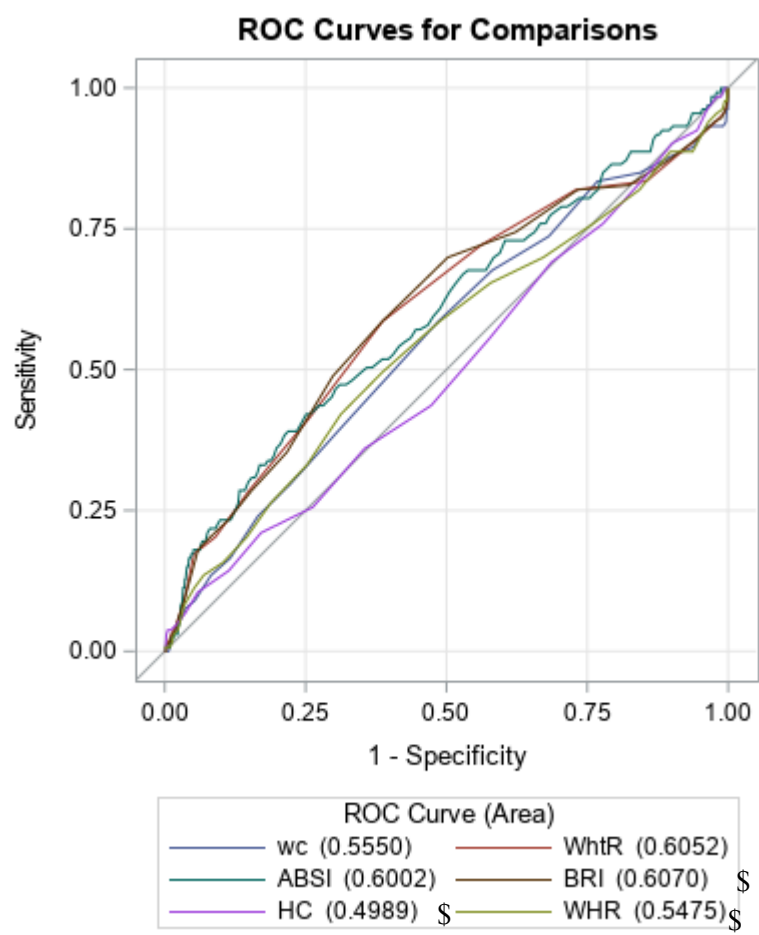

Male underweight

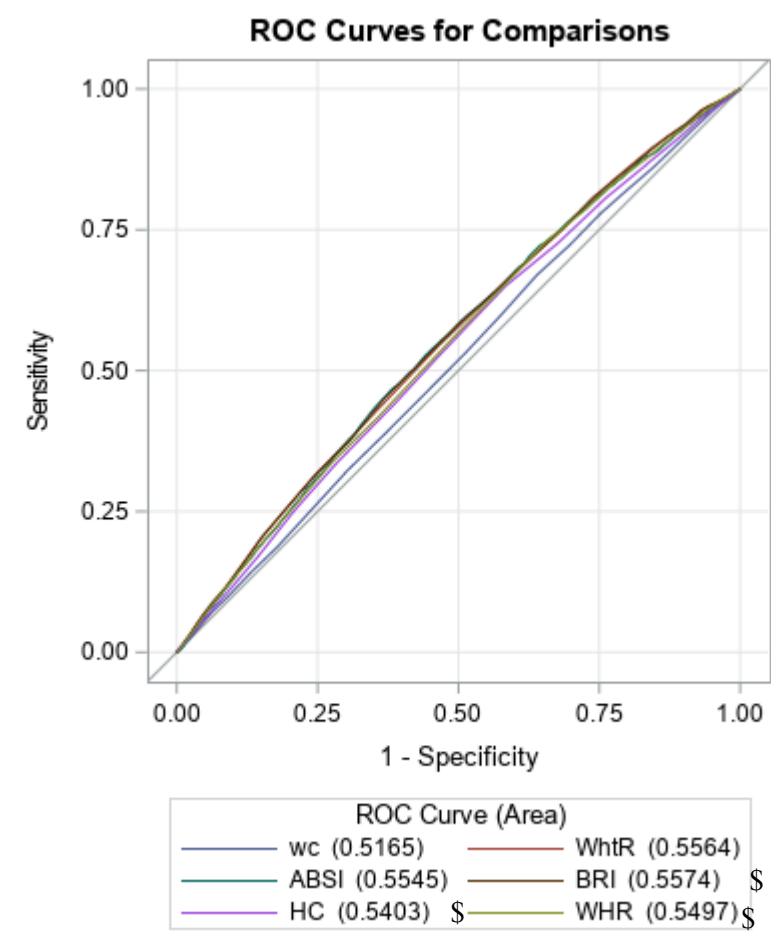

Male normal weight

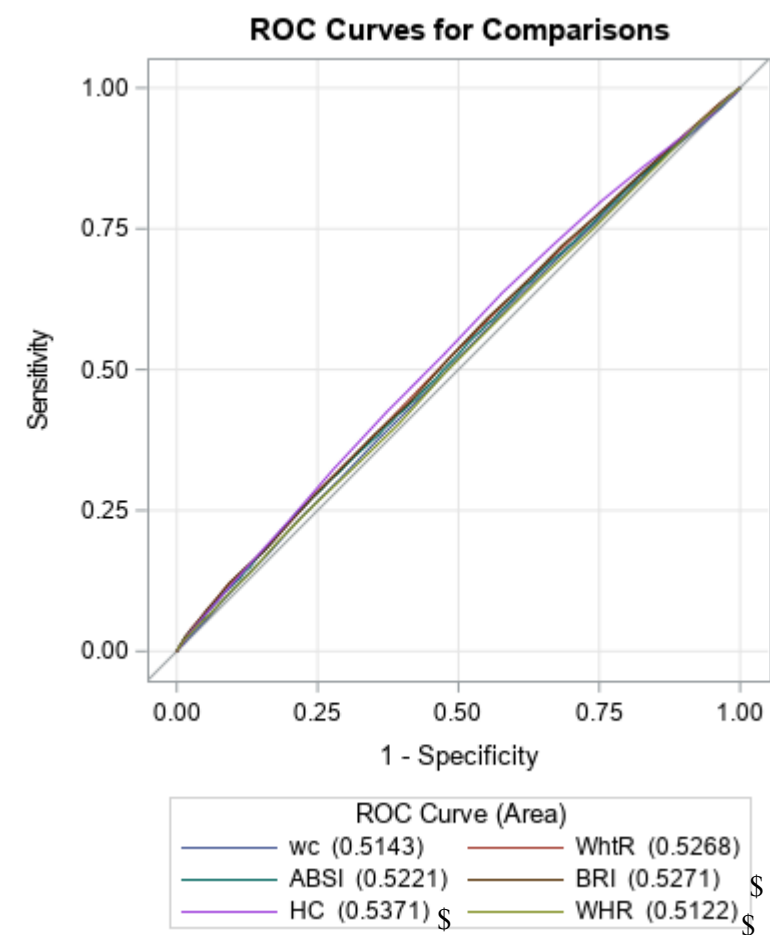

Male overweight

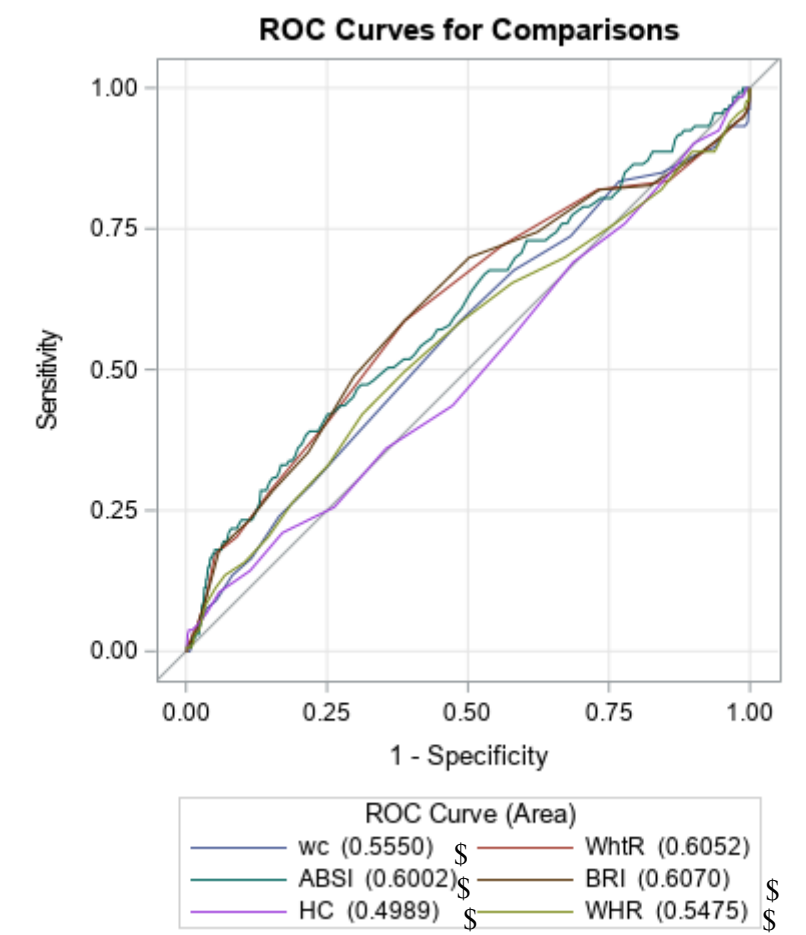

Male obese

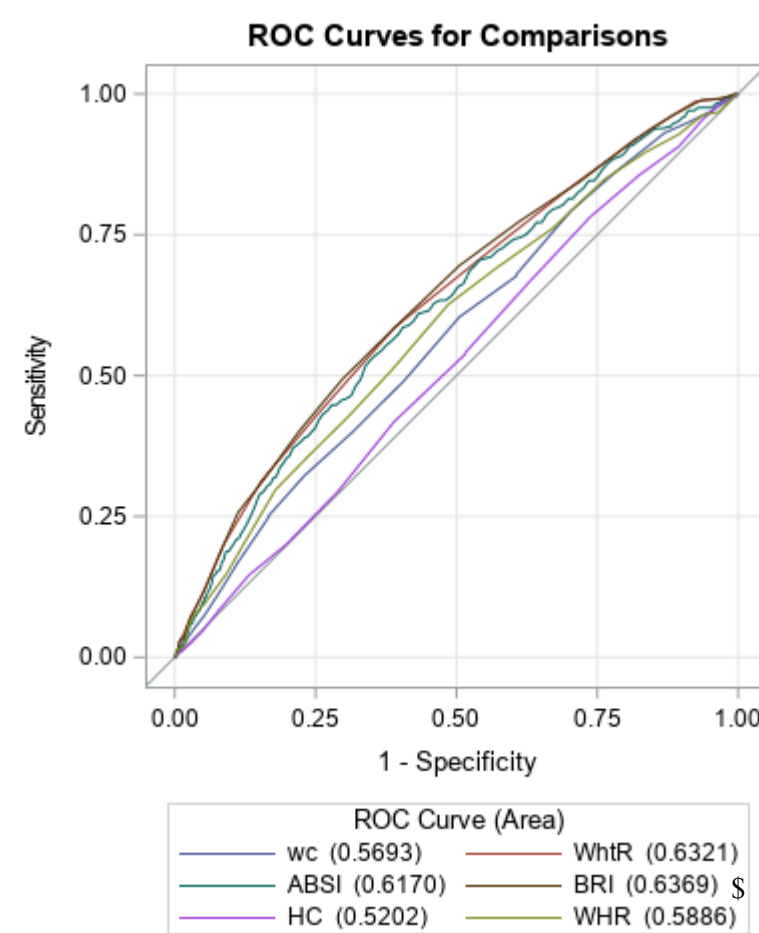

Female underweight

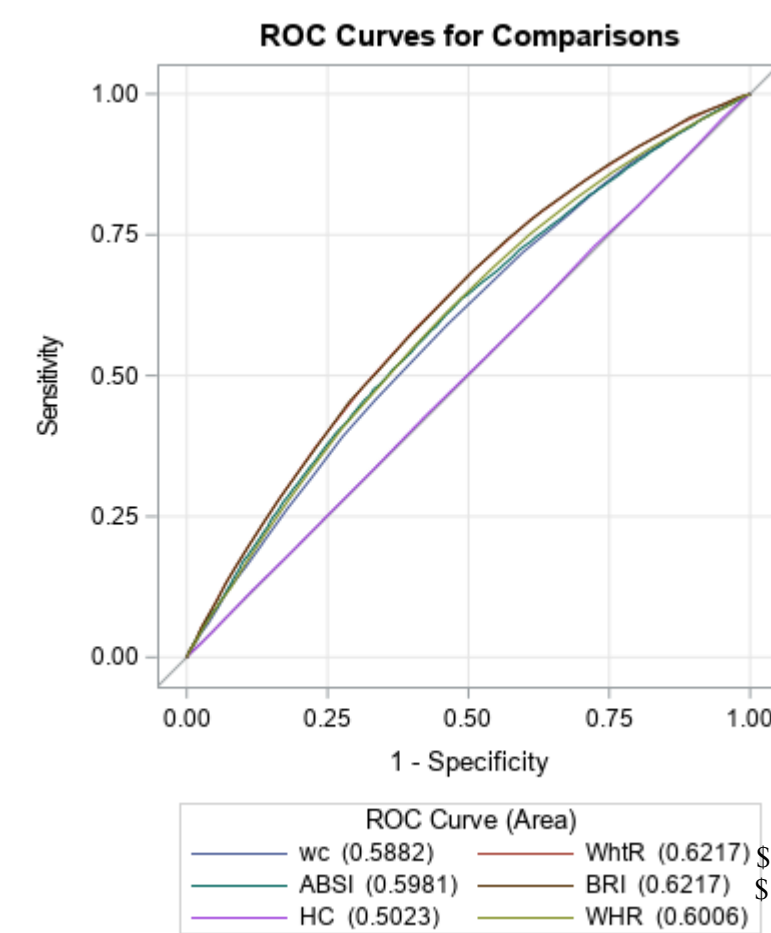

Female normal weight

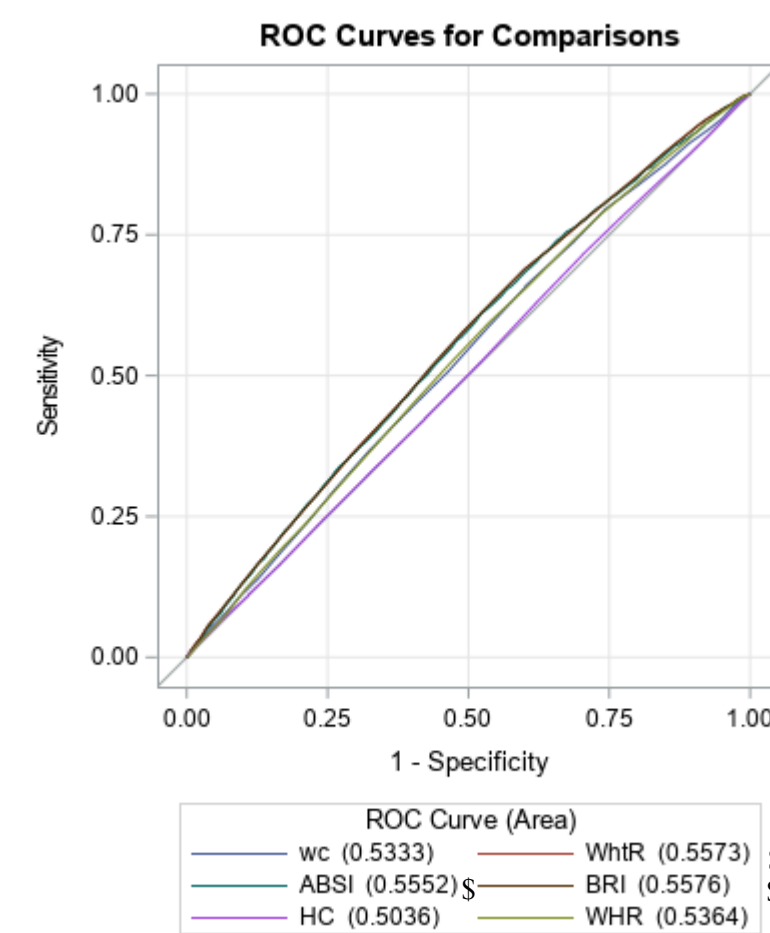

Female overweight

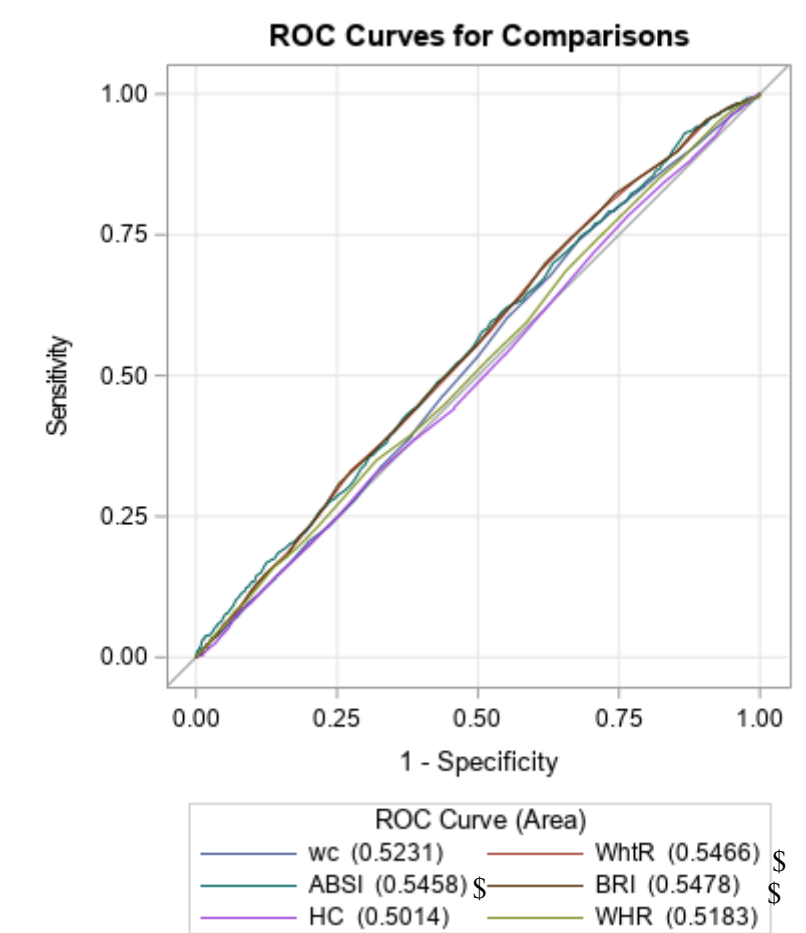

Female obese

Figure S6. Comparison on area under curves for diagnosing hypercholesterolemia between different waist and hip indices within each BMI category

\* Comparison on the area under different indices curves was based on Delong test; \$ mean that AUROC of those indices were similar to each other ( $P>0.05$ ) for identifying hypercholesterolemia within the specific BMI category, and meanwhile their AUROC were the highest in the six anthropometric indices ( $P<0.05$ ).

Abbreviation: AUROC, area under receiver operator curves; ROC, receiver operator curves; BMI, body mass index; WC, waist circumference; WHtR, waist height ratio; ABSI, a body shape index; BRI, body round index; HC, hip circumference; WHR, waist hip ratio.



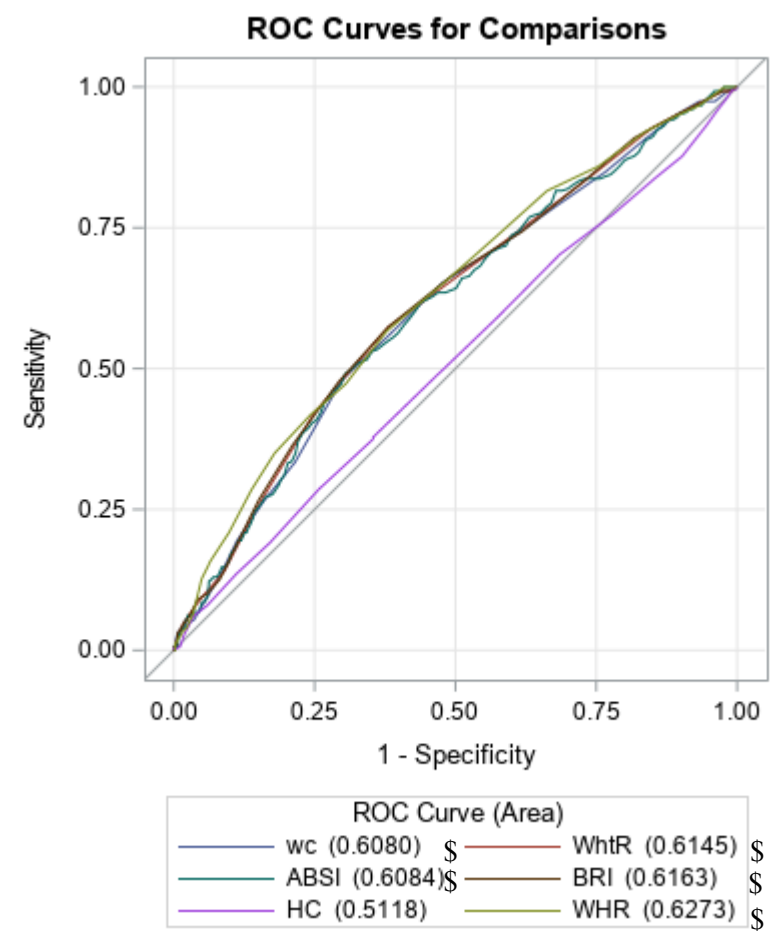

Male underweight

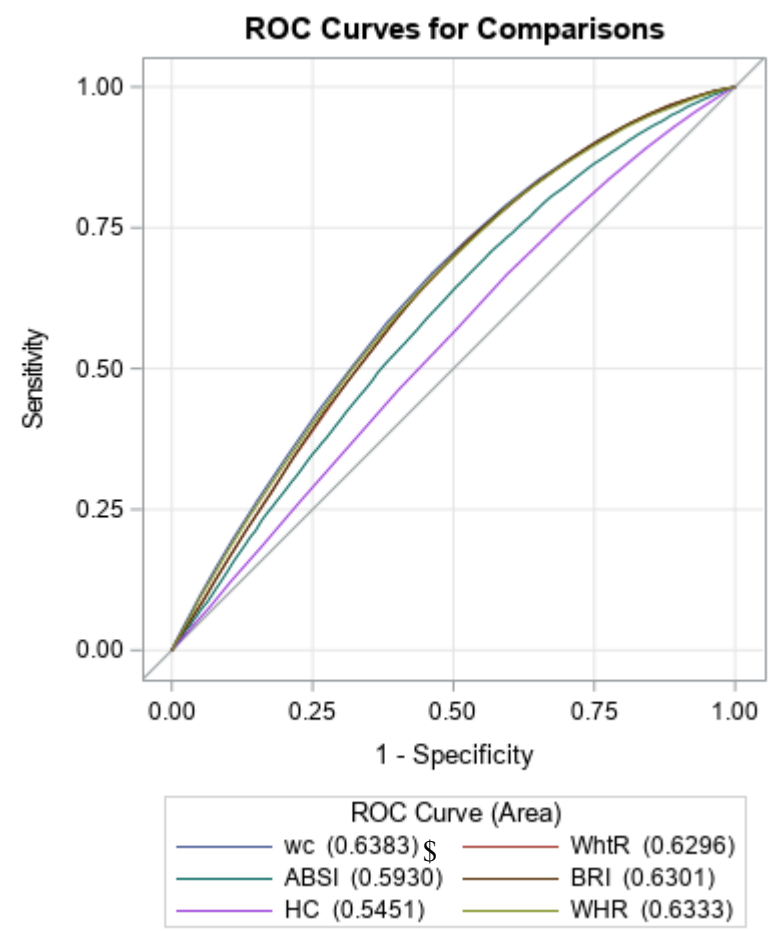

Male normal weight

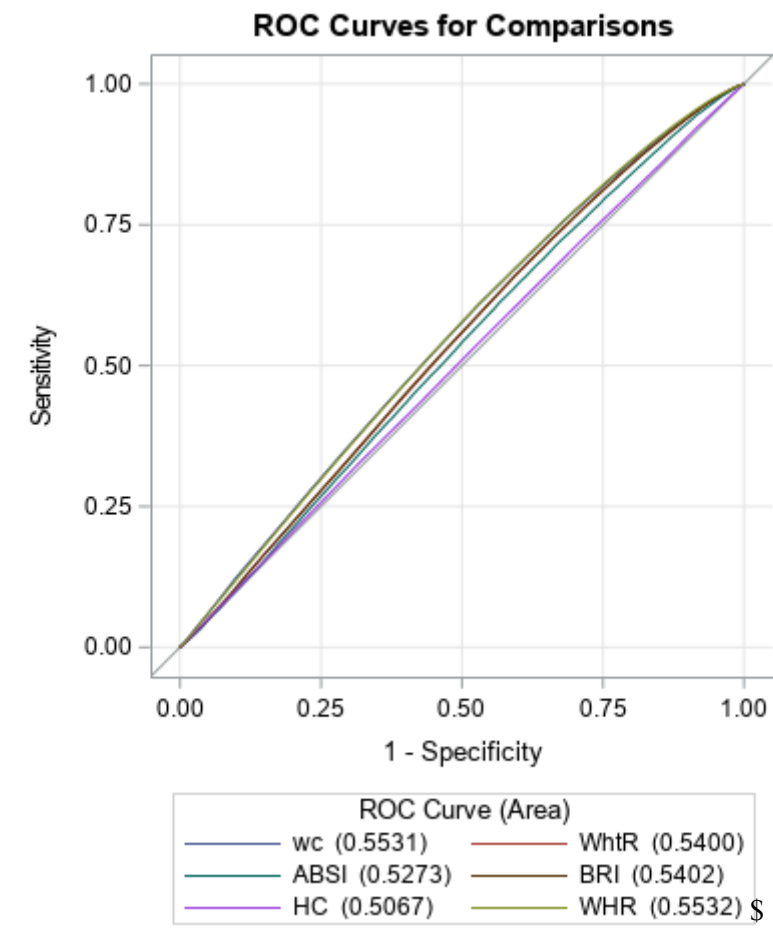

Male overweight

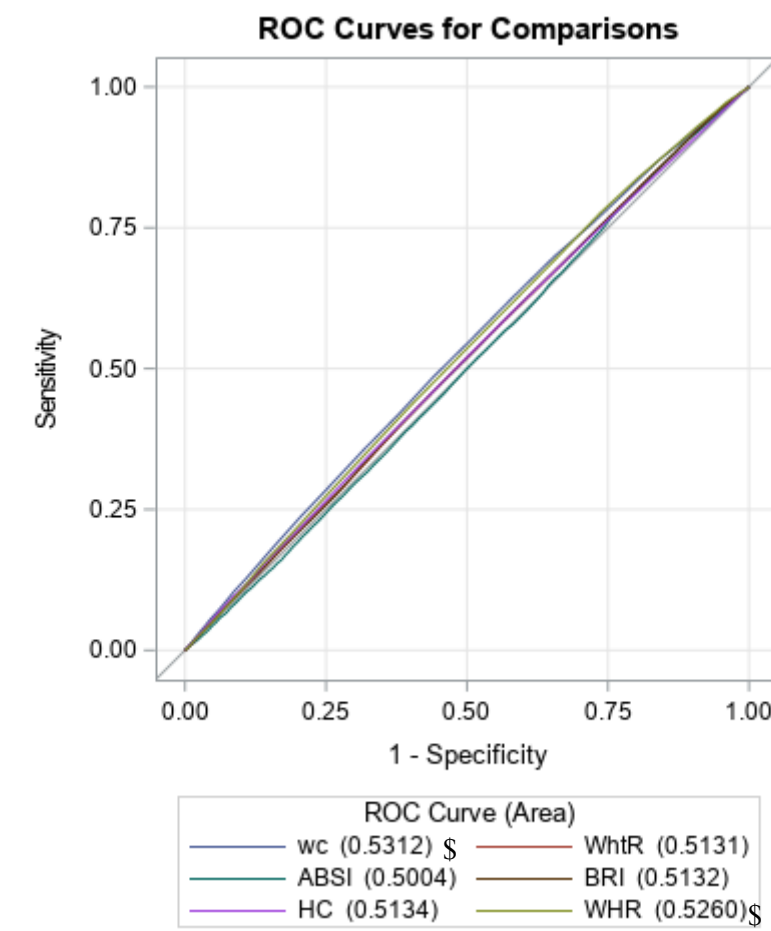

Male obese

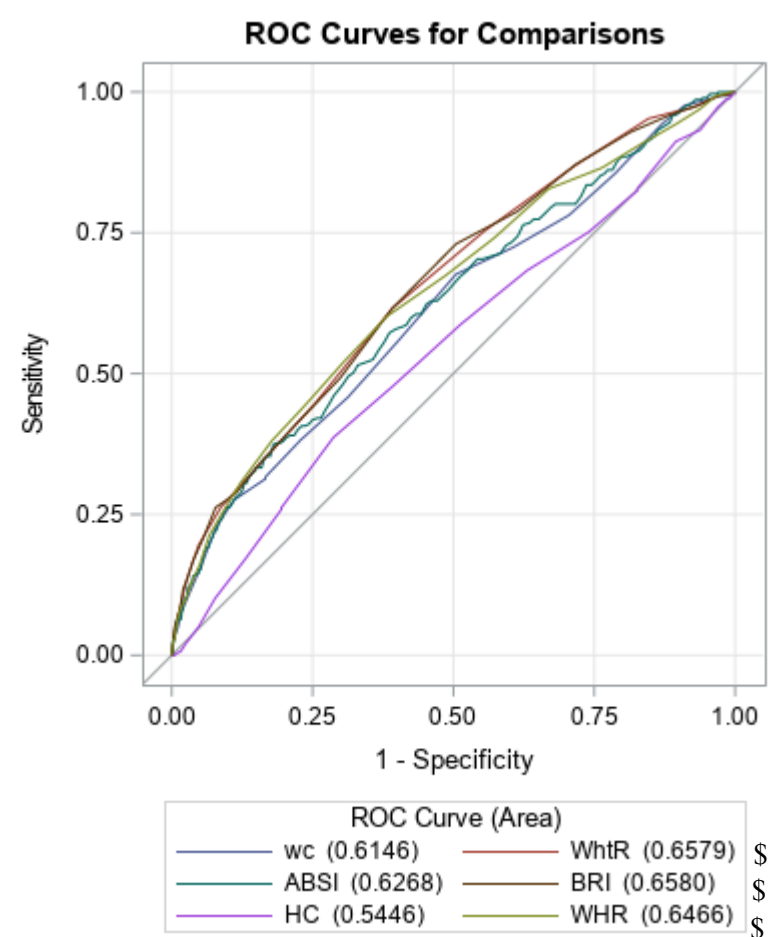

Female underweight

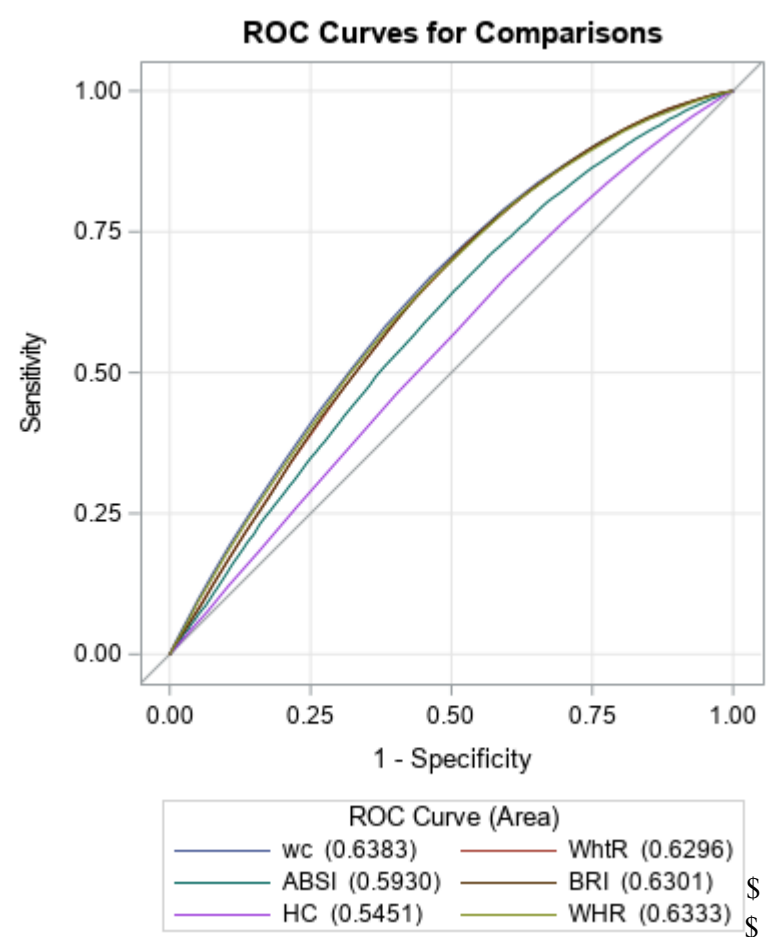

Female normal weight

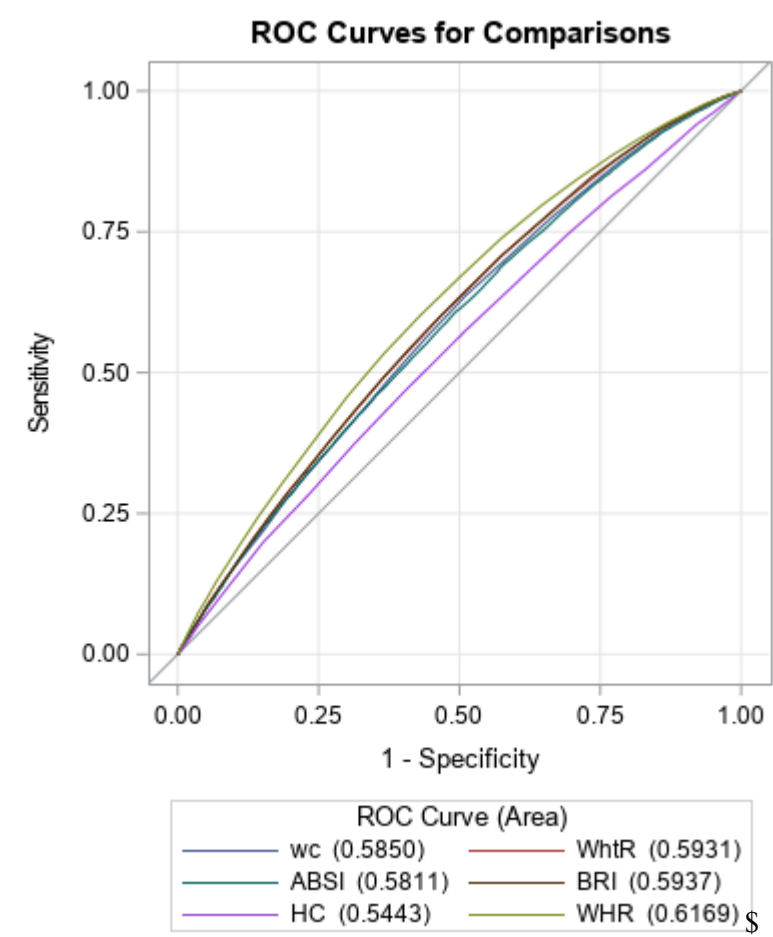

Female overweight

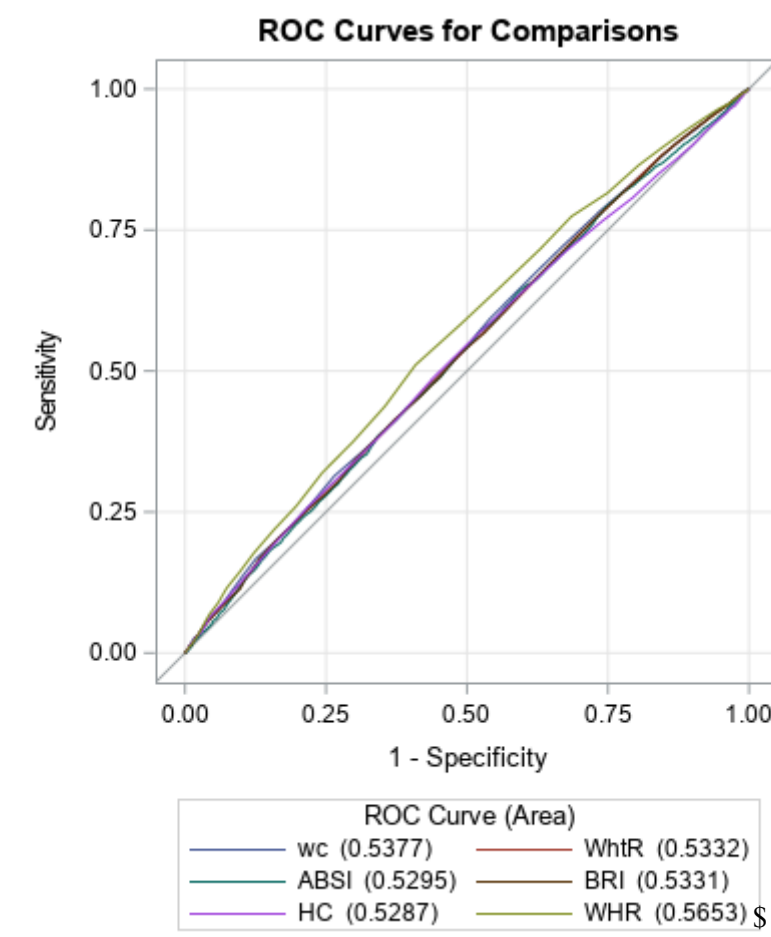

Female obese

Figure S7. Comparison on area under curves for diagnosing hypertriglyceridemia between different waist and hip indices within each BMI category

\* Comparison on the area under different indices curves was based on Delong test; \$ mean that AUROC of those indices were similar to each other ( $P>0.05$ ) for identifying hypertriglyceridemia within the specific BMI category, and meanwhile their AUROC were the highest in the six anthropometric indices ( $P<0.05$ ).

Abbreviation: AUROC, area under receiver operator curves; ROC, receiver operator curves; BMI, body mass index; WC, waist circumference; WHtR, waist height ratio; ABSI, a body shape index; BRI, body round index; HC, hip circumference; WHR, waist hip ratio.

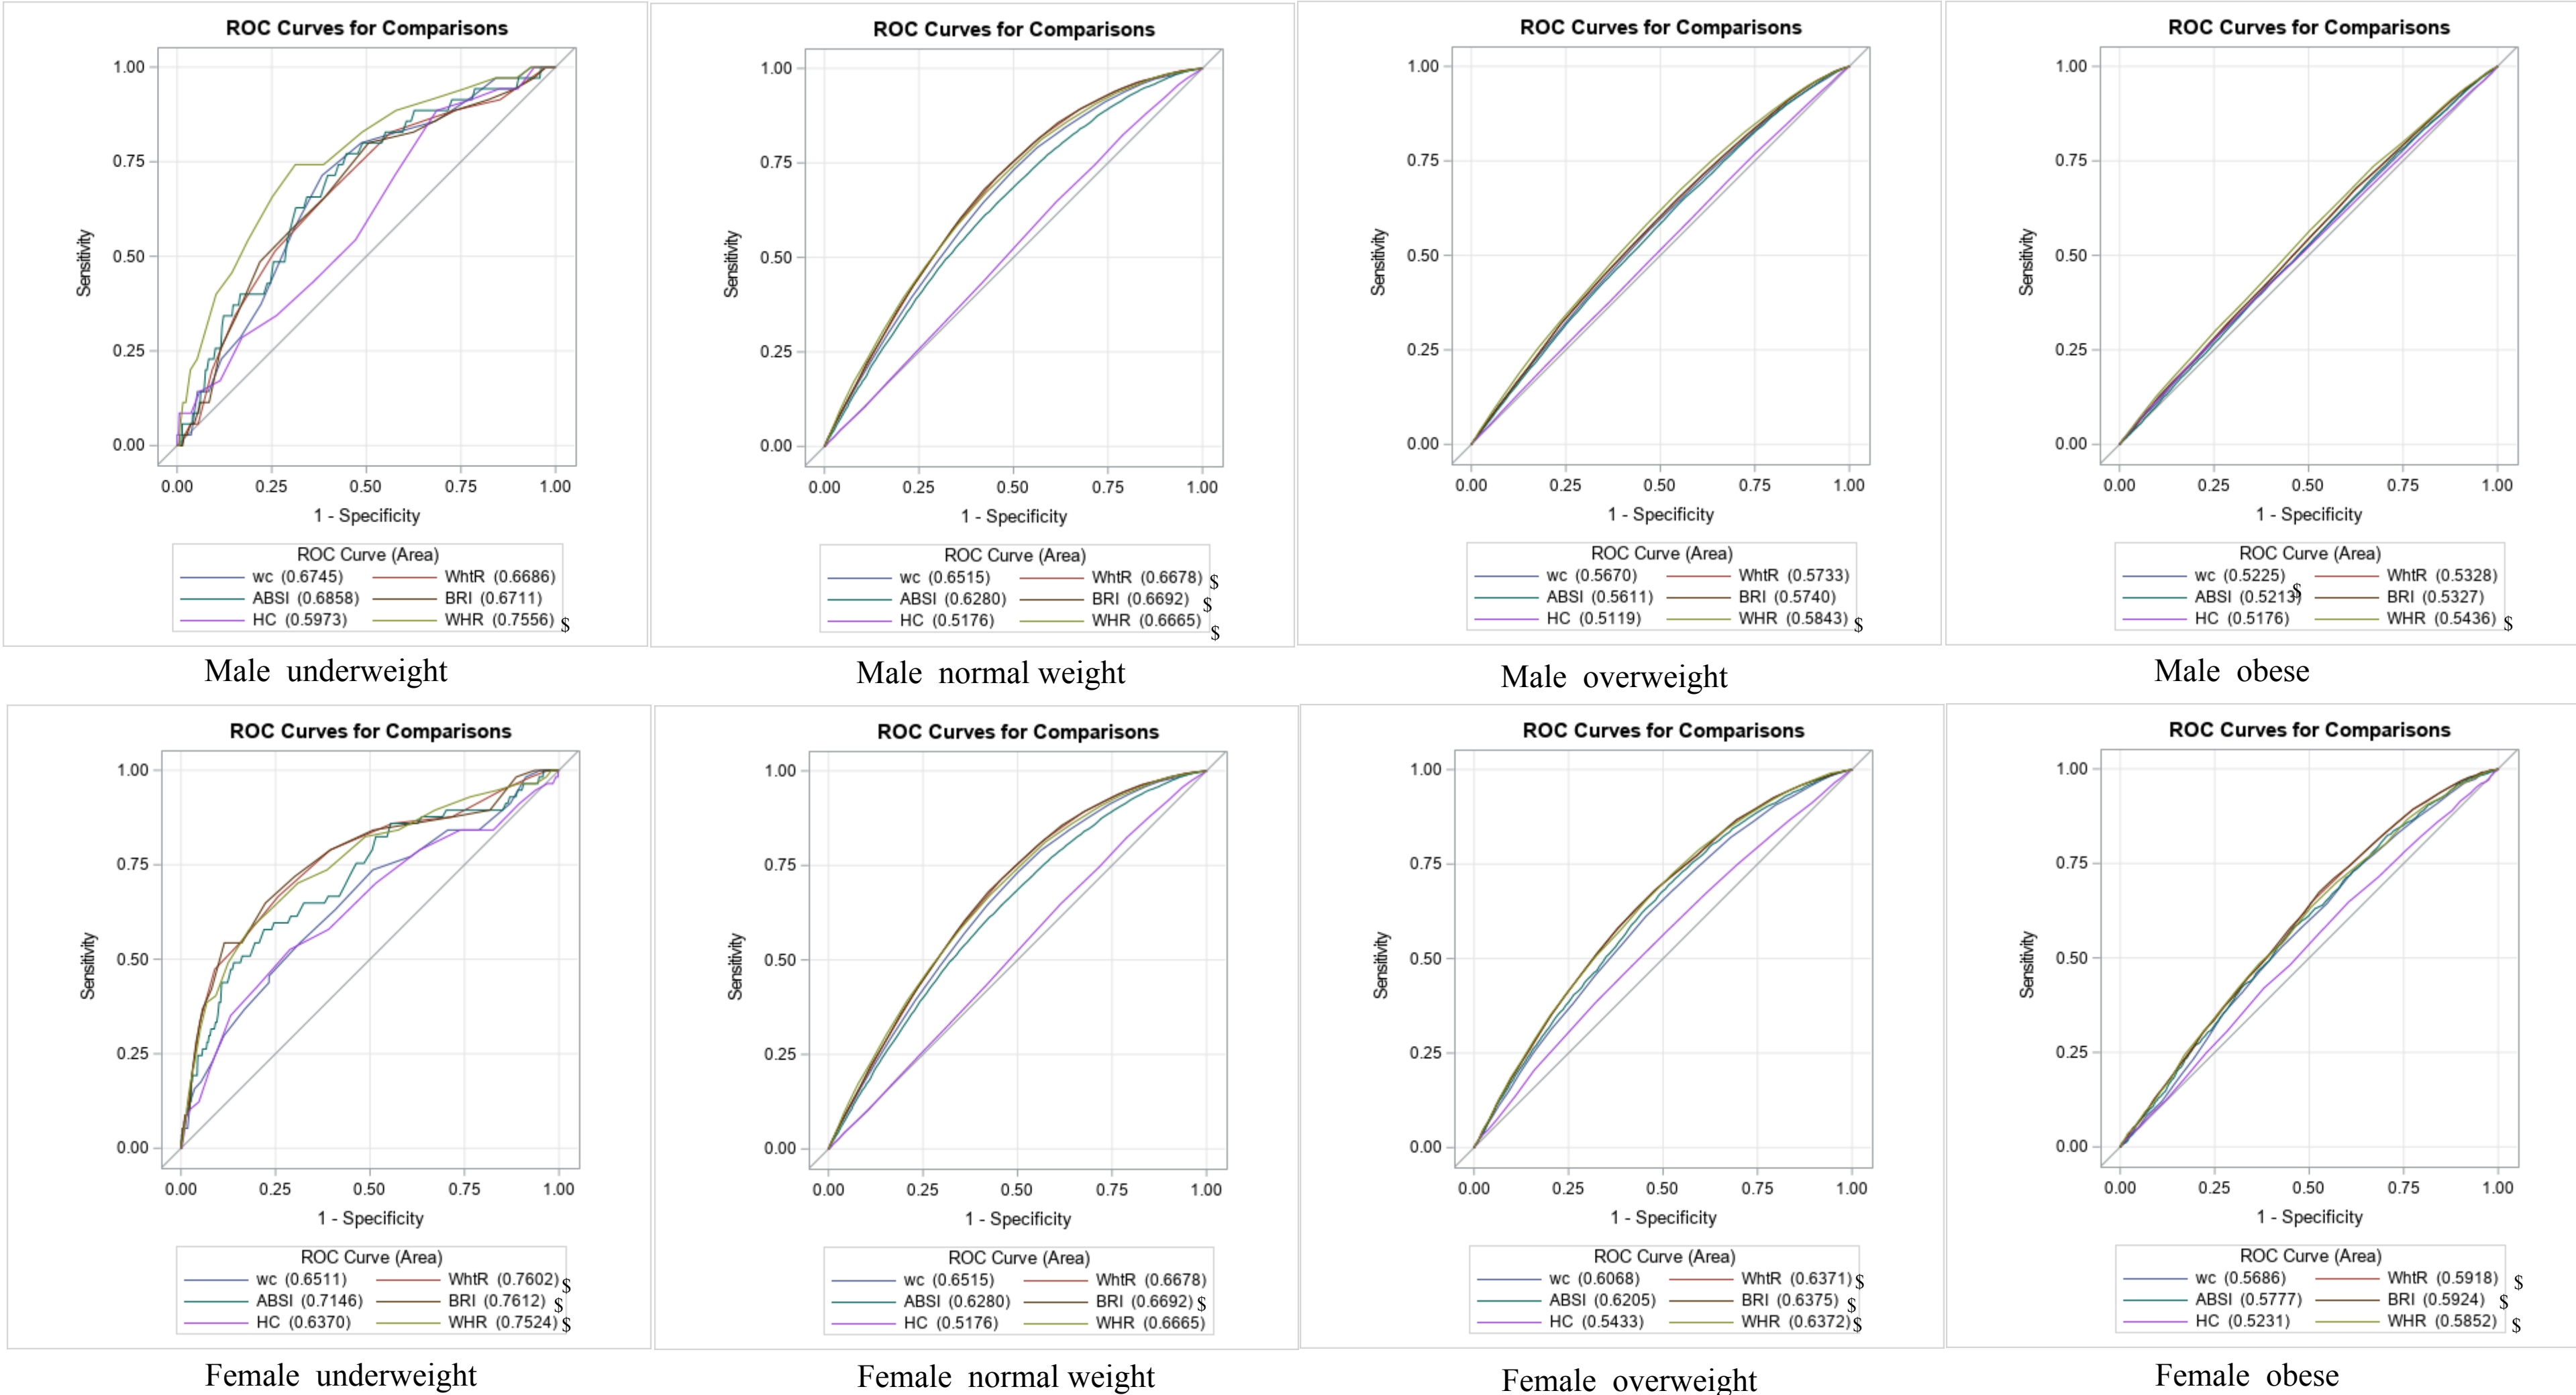

Figure S8. Comparison on area under curves for diagnosing mixed hyperlipidemia between different waist and hip indices within each BMI category

\* Comparison on the area under different indices curves was based on Delong test; \$ mean that AUROC of those indices were similar to each other ( $P > 0.05$ ) for identifying mixed hyperlipidemia within the specific BMI category, and meanwhile their AUROC were the highest in the six anthropometric indices ( $P < 0.05$ ).

Abbreviation: AUROC, area under receiver operator curves; ROC, receiver operator curves; BMI, body mass index; WC, waist circumference; WHtR, waist height ratio; ABSI, a body shape index; BRI, body round index; HC, hip circumference; WHR, waist hip ratio.

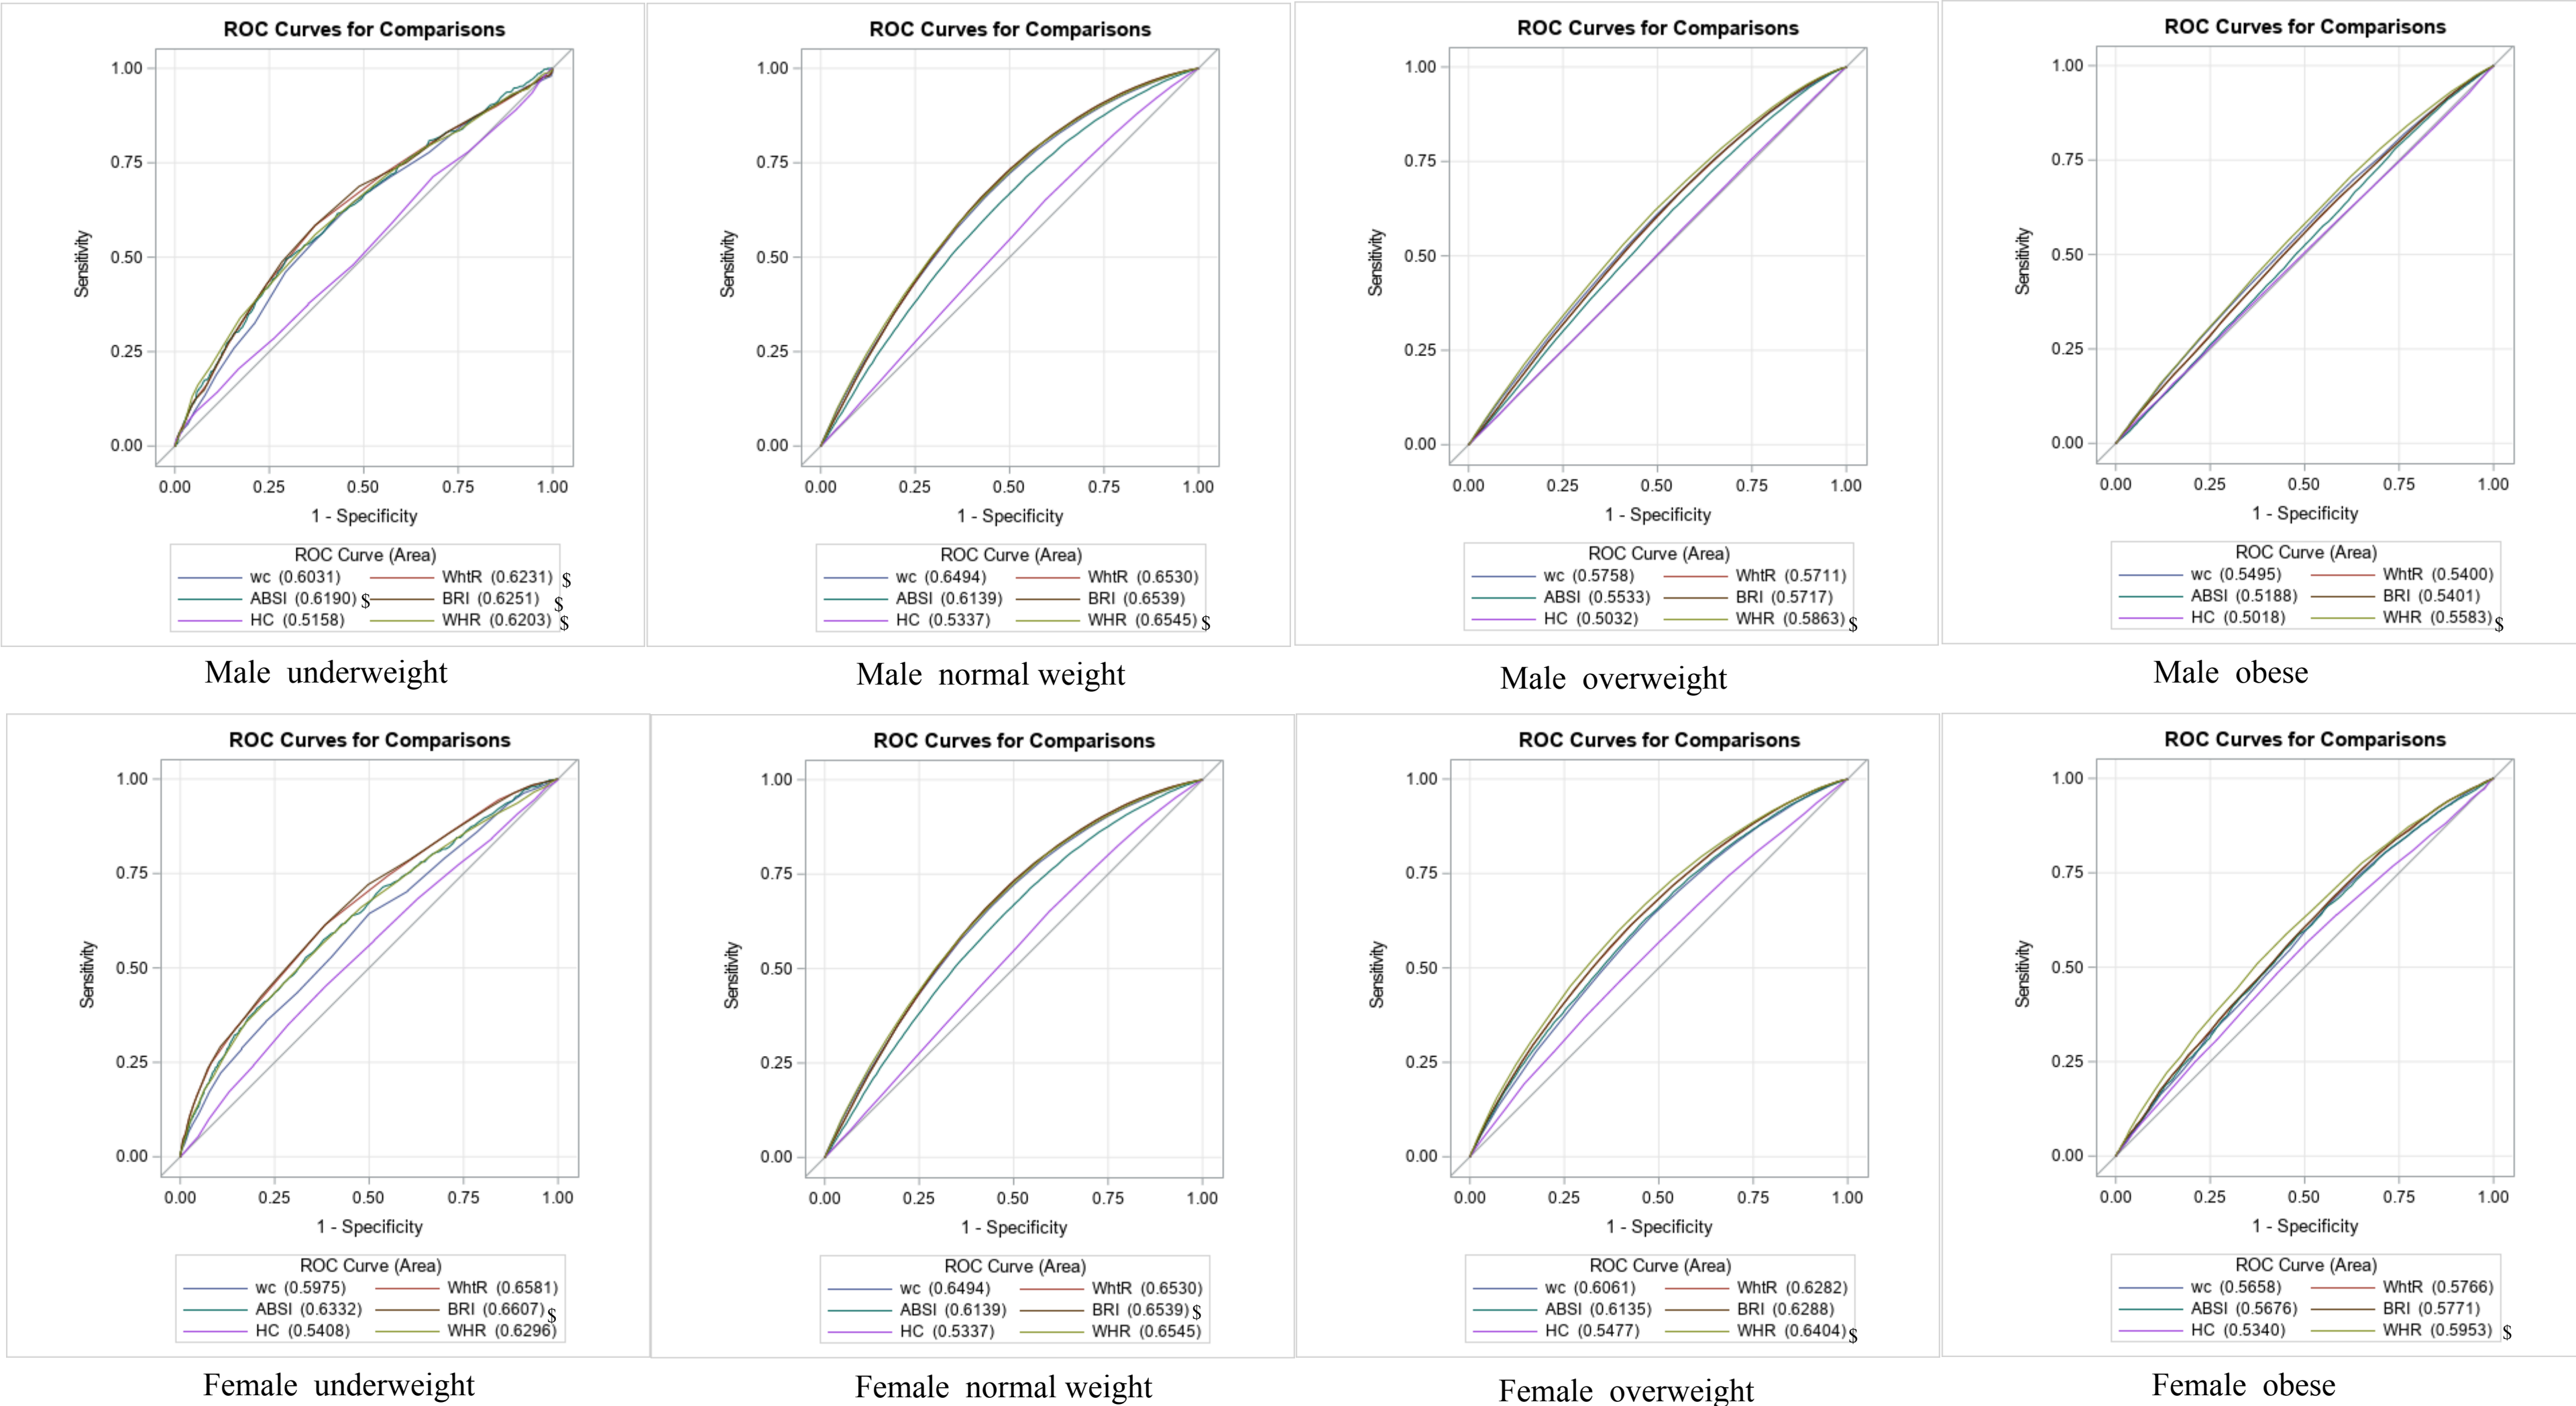

Figure S9. Comparison on area under curves for diagnosing dyslipidemia between different waist and hip indices within each BMI category

\* Comparison on the area under different indices curves was based on Delong test; \$ mean that AUROC of those indices were similar to each other ( $P > 0.05$ ) for identifying dyslipidemia within the specific BMI category, and meanwhile their AUROC were the highest in the six anthropometric indices ( $P < 0.05$ ).

Abbreviation: AUROC, area under receiver operator curves; ROC, receiver operator curves; BMI, body mass index; WC, waist circumference; WhtR, waist height ratio; ABSI, a body shape index; BRI, body round index; HC, hip circumference; WHR, waist hip ratio.



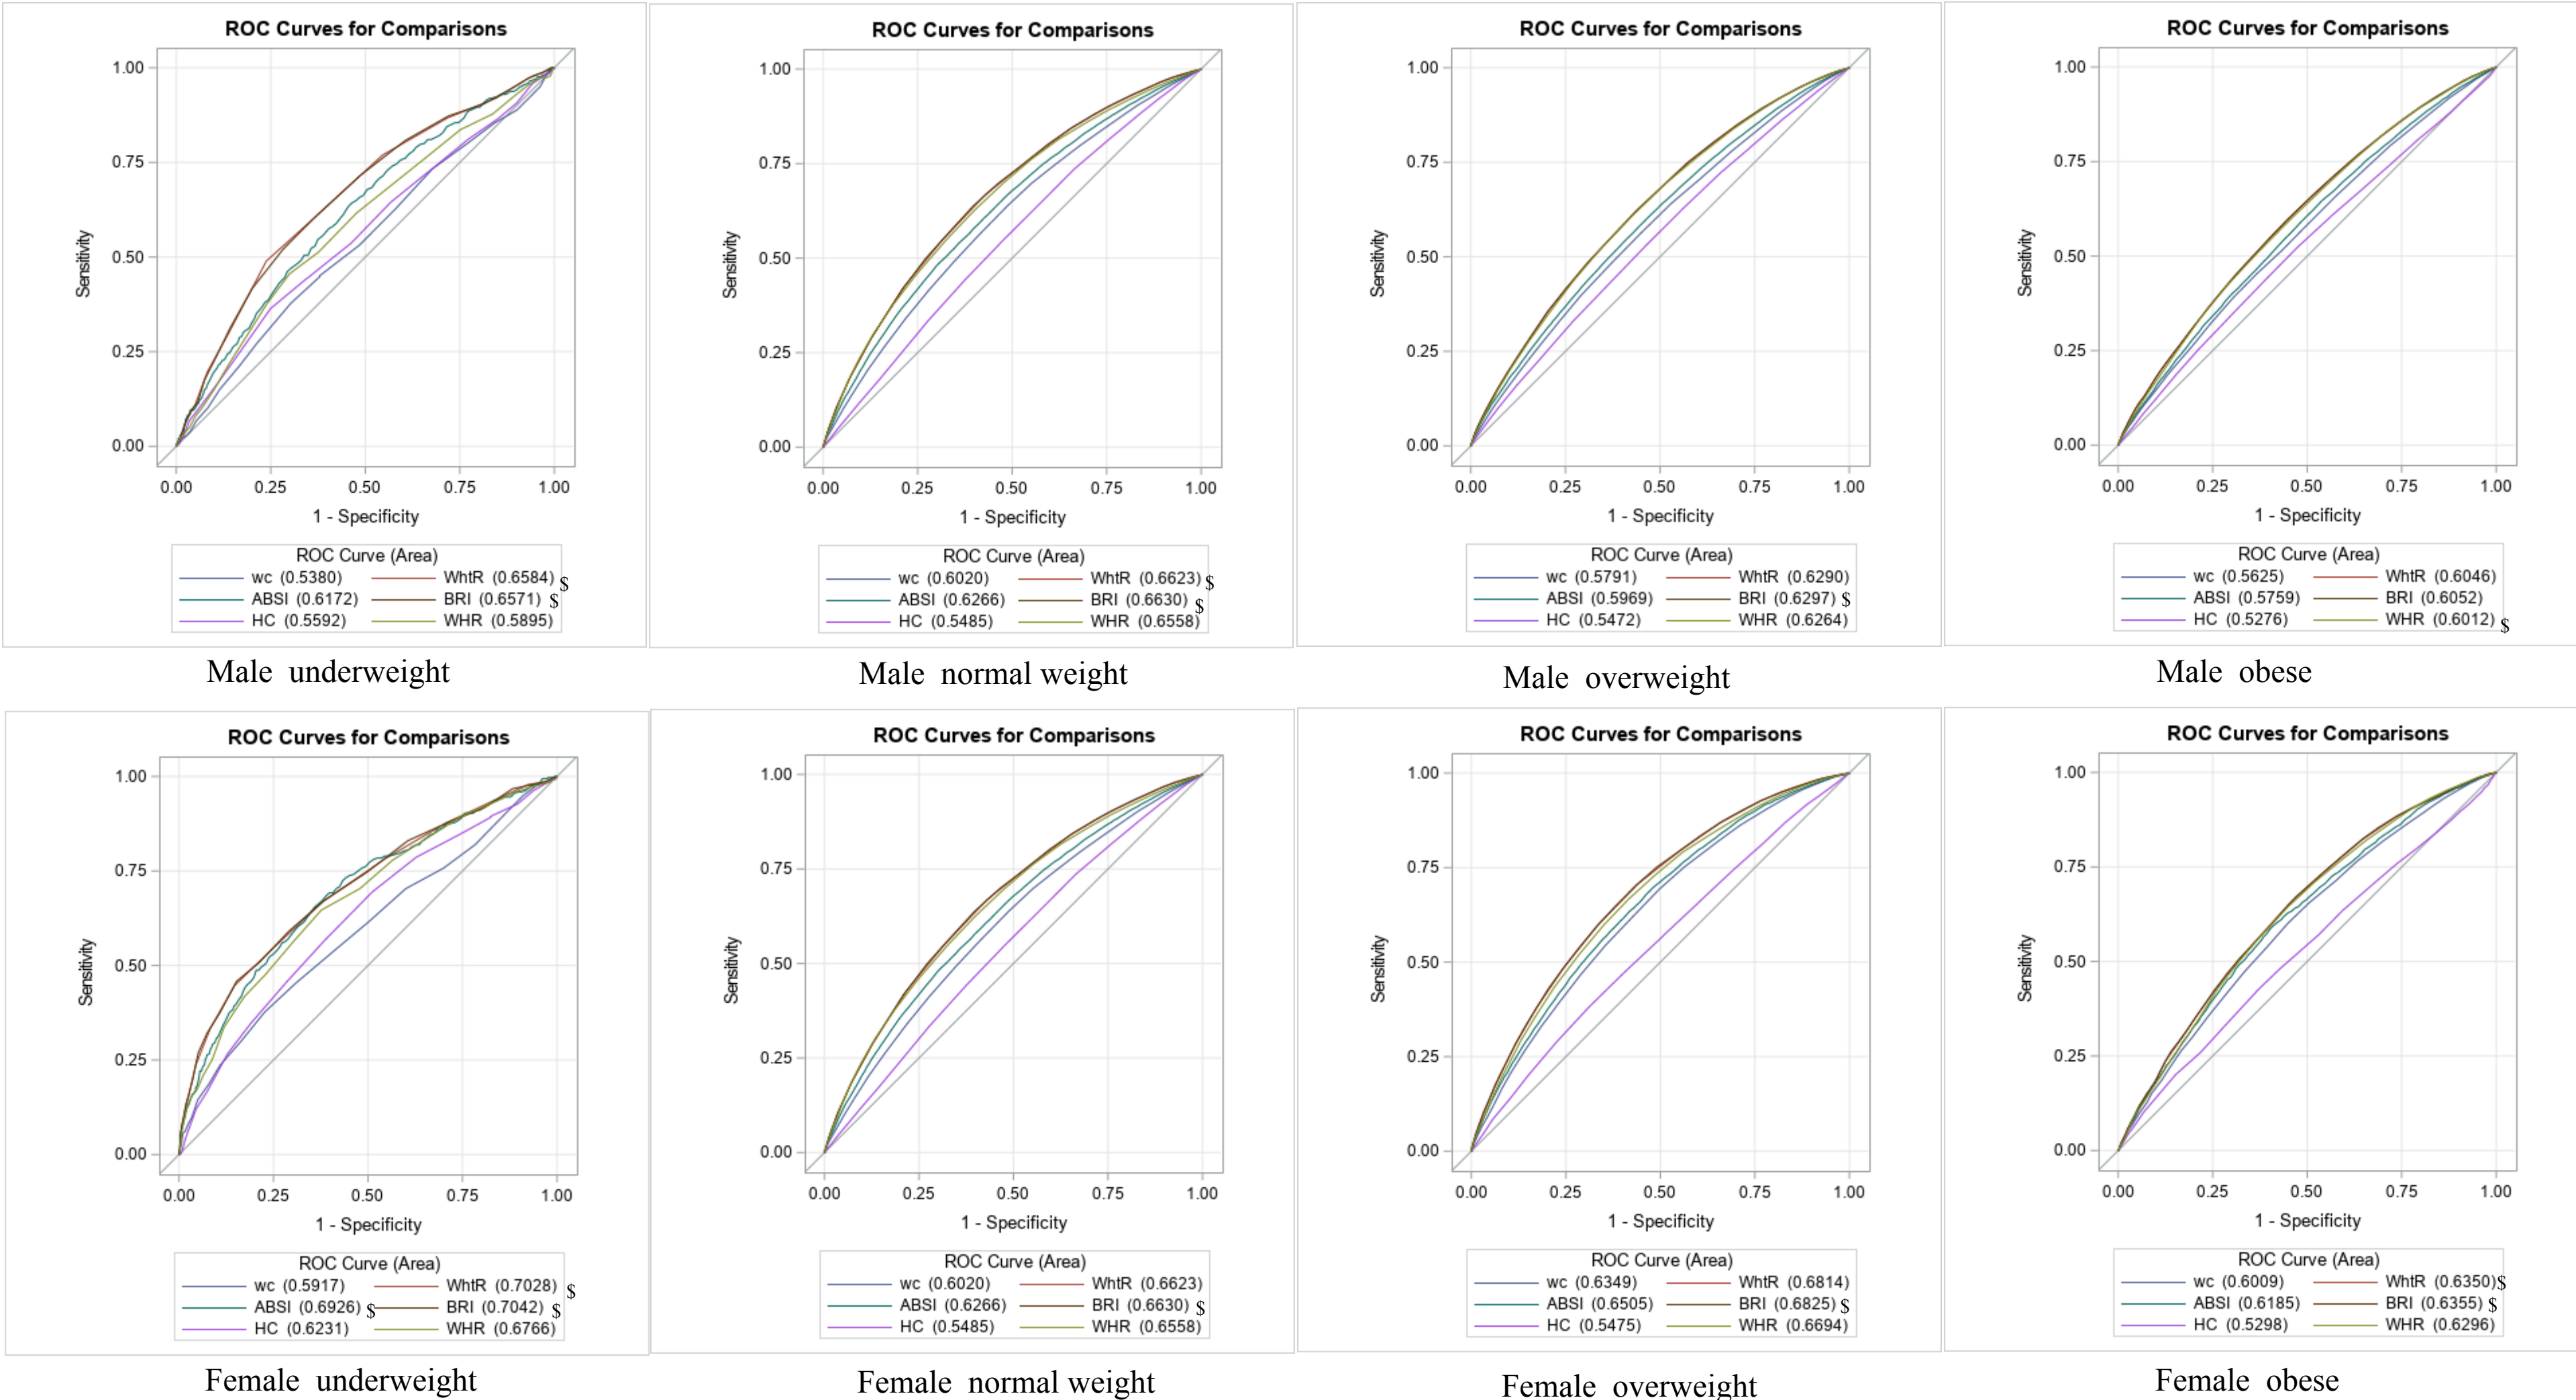

Figure S10. Comparison on area under curves for diagnosing hypertension between different waist and hip indices within each BMI category

\* Comparison on the area under different indices curves was based on Delong test; \$ mean that AUROC of those indices were similar to each other ( $P > 0.05$ ) for identifying hypertension within the specific BMI category, and meanwhile their AUROC were the highest in the six anthropometric indices ( $P < 0.05$ ).

Abbreviation: AUROC, area under receiver operator curves; ROC, receiver operator curves; BMI, body mass index; WC, waist circumference; WHtR, waist height ratio; ABSI, a body shape index; BRI, body round index; HC, hip circumference; WHR, waist hip ratio.



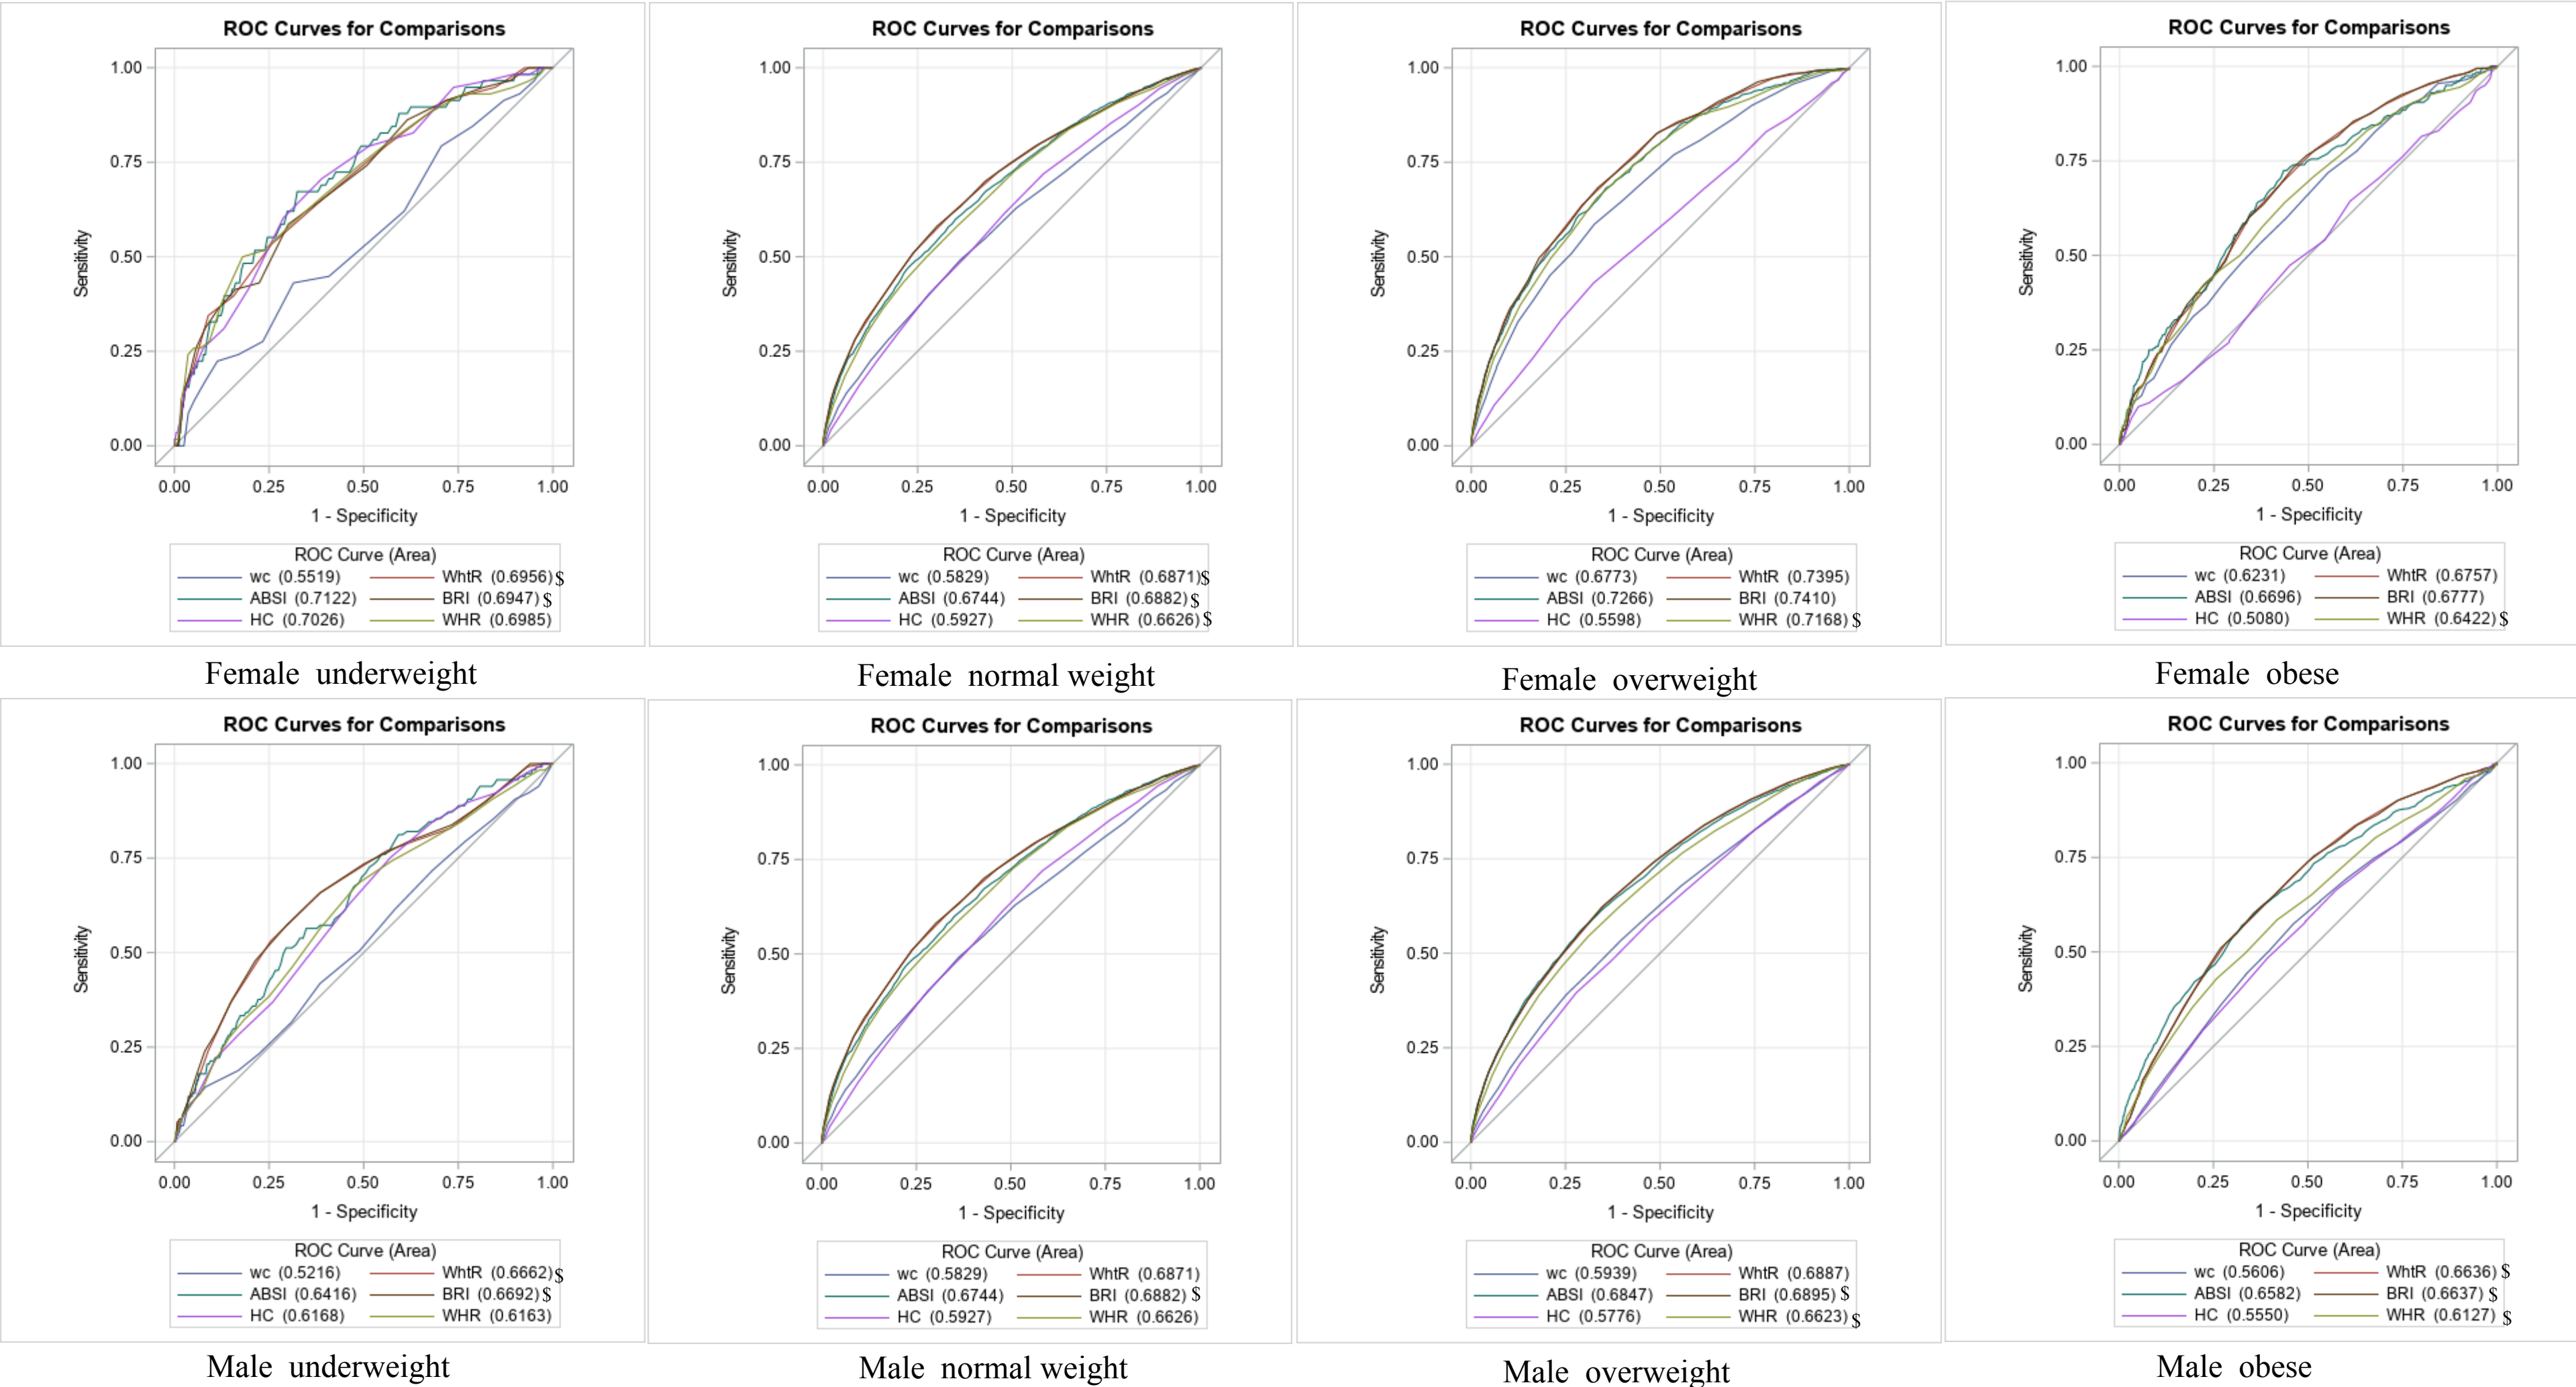

Figure S11. Comparison on area under curves for diagnosing chronic kidney disease between different waist and hip indices within each BMI category

\* Comparison on the area under different indices curves was based on Delong test; \$ mean that AUROC of those indices were similar to each other ( $P > 0.05$ ) for identifying chronic kidney disease within the specific BMI category, and meanwhile their AUROC were the highest in the six anthropometric indices ( $P < 0.05$ ).

Abbreviation: AUROC, area under receiver operator curves; ROC, receiver operator curves; BMI, body mass index; WC, waist circumference; WHtR, waist height ratio; ABSI, a body shape index; BRI, body round index; HC, hip circumference; WHR, waist hip ratio.

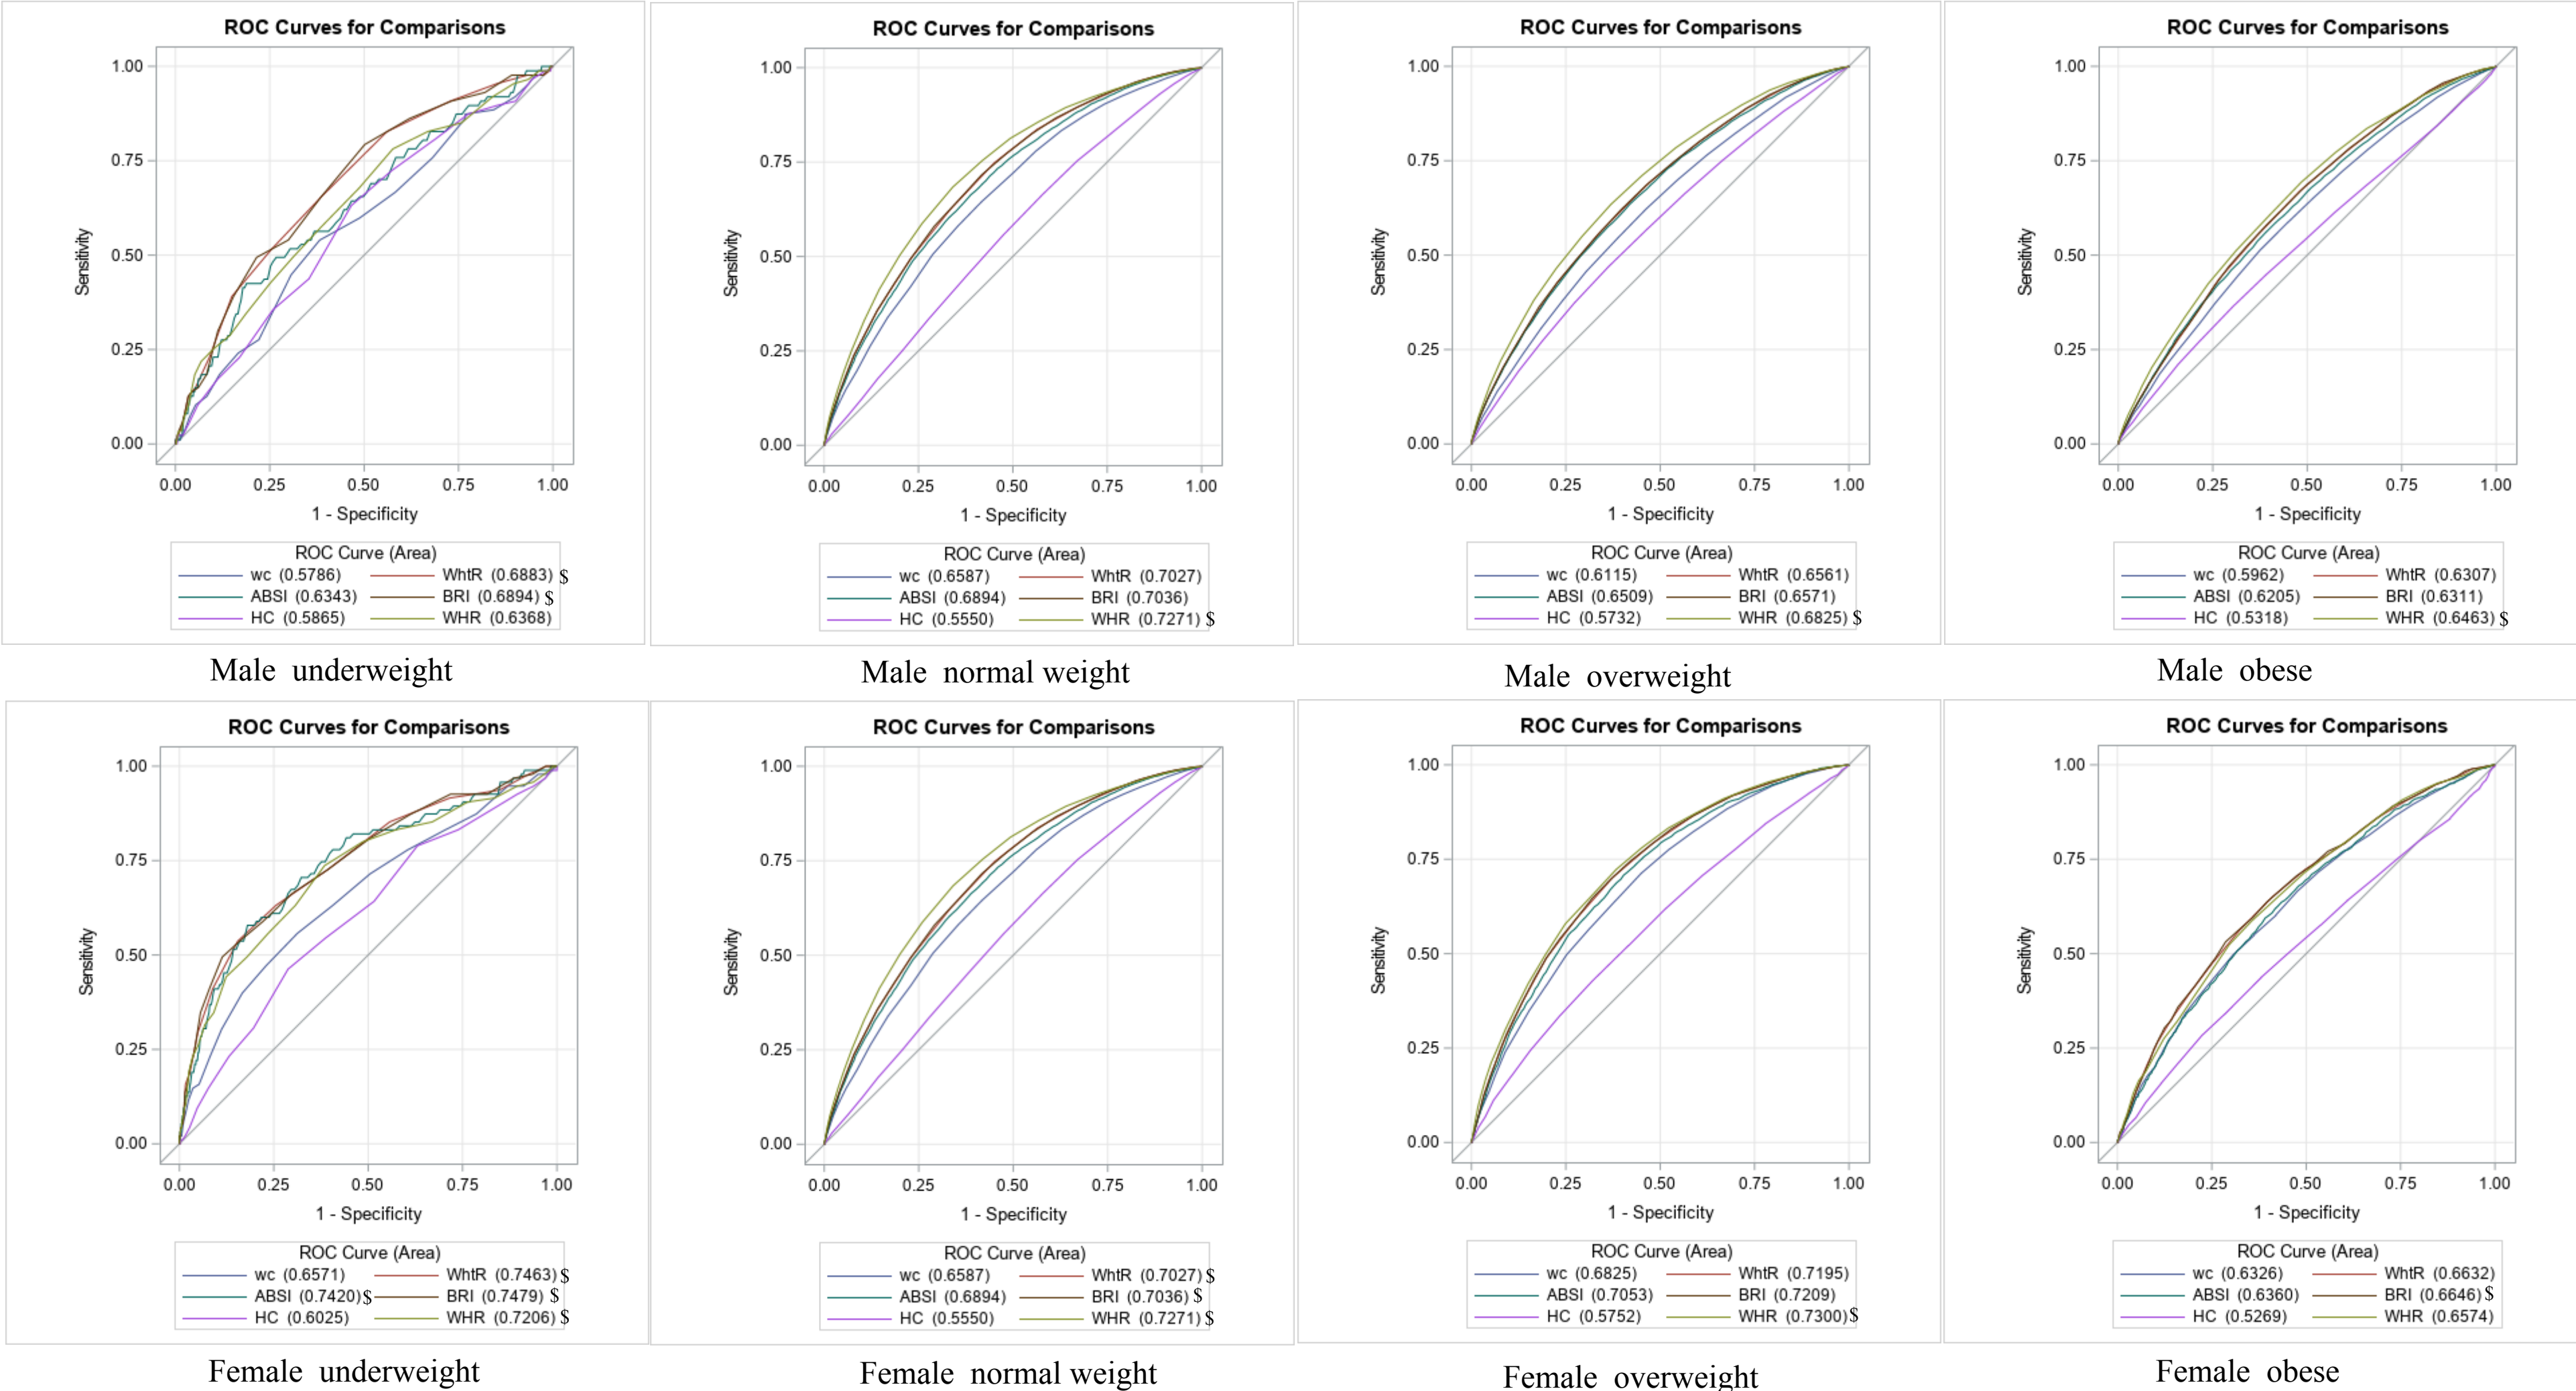

Figure S12. Comparison on area under curves for diagnosing diabetic mellitus between different waist and hip indices within each BMI category

\* Comparison on the area under different indices curves was based on Delong test; \$ mean that AUROC of those indices were similar to each other ( $P>0.05$ ) for identifying diabetic mellitus within the specific BMI category, and meanwhile their AUROC were the highest in the six anthropometric indices ( $P<0.05$ ).

Abbreviation: AUROC, area under receiver operator curves; ROC, receiver operator curves; BMI, body mass index; WC, waist circumference; WHtR, waist height ratio; ABSI, a body shape index; BRI, body round index; HC, hip circumference; WHR, waist hip ratio.

|            |       | Waist circumference(CM) |       |       |       |       |       |       |       |       |       |       |       |       |       |       |       |       |       |       |       |       |       |       |       |       |       |       |
|------------|-------|-------------------------|-------|-------|-------|-------|-------|-------|-------|-------|-------|-------|-------|-------|-------|-------|-------|-------|-------|-------|-------|-------|-------|-------|-------|-------|-------|-------|
|            |       | 60                      | 62    | 64    | 66    | 68    | 70    | 72    | 74    | 76    | 78    | 80    | 82    | 84    | 86    | 88    | 90    | 92    | 94    | 96    | 98    | 100   | 102   | 104   | 106   | 108   | 110   | 112   |
| Height(CM) | 146   | 1.841                   | 2.055 | 2.276 | 2.504 | 2.739 | 2.982 | 3.231 | 3.488 | 3.752 | 4.024 | 4.302 | 4.588 | 4.882 | 5.182 | 5.490 | 5.805 | 6.128 | 6.458 | 6.795 | 7.140 | 7.492 | 7.852 | 8.219 | 8.594 | 8.977 | 9.366 | 9.764 |
|            | 148   | 1.756                   | 1.964 | 2.179 | 2.401 | 2.630 | 2.866 | 3.109 | 3.359 | 3.616 | 3.880 | 4.151 | 4.429 | 4.714 | 5.007 | 5.306 | 5.613 | 5.926 | 6.247 | 6.576 | 6.911 | 7.254 | 7.603 | 7.961 | 8.325 | 8.697 | 9.076 | 9.462 |
|            | 150   | 1.675                   | 1.877 | 2.087 | 2.303 | 2.525 | 2.755 | 2.991 | 3.235 | 3.485 | 3.742 | 4.005 | 4.276 | 4.554 | 4.838 | 5.129 | 5.428 | 5.733 | 6.045 | 6.365 | 6.691 | 7.024 | 7.365 | 7.712 | 8.067 | 8.428 | 8.797 | 9.173 |
|            | 152   | 1.597                   | 1.794 | 1.998 | 2.208 | 2.425 | 2.648 | 2.879 | 3.115 | 3.359 | 3.609 | 3.866 | 4.129 | 4.399 | 4.676 | 4.960 | 5.250 | 5.548 | 5.851 | 6.162 | 6.480 | 6.804 | 7.136 | 7.474 | 7.819 | 8.171 | 8.530 | 8.895 |
|            | 154   | 1.522                   | 1.714 | 1.912 | 2.117 | 2.328 | 2.546 | 2.770 | 3.001 | 3.238 | 3.481 | 3.731 | 3.988 | 4.251 | 4.521 | 4.797 | 5.080 | 5.369 | 5.665 | 5.968 | 6.277 | 6.593 | 6.915 | 7.245 | 7.580 | 7.923 | 8.273 | 8.629 |
|            | 156   | 1.449                   | 1.637 | 1.830 | 2.029 | 2.235 | 2.447 | 2.666 | 2.891 | 3.122 | 3.359 | 3.602 | 3.852 | 4.109 | 4.371 | 4.640 | 4.916 | 5.198 | 5.486 | 5.781 | 6.082 | 6.390 | 6.704 | 7.024 | 7.351 | 7.685 | 8.025 | 8.372 |
|            | 158   | 1.380                   | 1.562 | 1.751 | 1.945 | 2.146 | 2.353 | 2.566 | 2.785 | 3.010 | 3.241 | 3.478 | 3.722 | 3.972 | 4.228 | 4.490 | 4.758 | 5.033 | 5.314 | 5.601 | 5.894 | 6.194 | 6.500 | 6.813 | 7.131 | 7.456 | 7.788 | 8.126 |
|            | 160   | 1.313                   | 1.491 | 1.675 | 1.864 | 2.060 | 2.262 | 2.469 | 2.682 | 2.902 | 3.127 | 3.359 | 3.596 | 3.840 | 4.089 | 4.345 | 4.606 | 4.874 | 5.148 | 5.428 | 5.714 | 6.006 | 6.304 | 6.609 | 6.919 | 7.236 | 7.559 | 7.889 |
|            | 162   | 1.249                   | 1.422 | 1.601 | 1.786 | 1.977 | 2.174 | 2.376 | 2.584 | 2.798 | 3.018 | 3.244 | 3.475 | 3.713 | 3.956 | 4.205 | 4.460 | 4.721 | 4.988 | 5.261 | 5.540 | 5.825 | 6.116 | 6.413 | 6.715 | 7.024 | 7.339 | 7.660 |
|            | 164   | 1.187                   | 1.356 | 1.531 | 1.711 | 1.897 | 2.089 | 2.287 | 2.490 | 2.698 | 2.913 | 3.133 | 3.359 | 3.590 | 3.828 | 4.071 | 4.320 | 4.574 | 4.835 | 5.101 | 5.373 | 5.651 | 5.934 | 6.224 | 6.519 | 6.820 | 7.127 | 7.440 |
|            | 166   | 1.127                   | 1.292 | 1.463 | 1.639 | 1.820 | 2.008 | 2.200 | 2.398 | 2.602 | 2.811 | 3.026 | 3.247 | 3.472 | 3.704 | 3.941 | 4.184 | 4.432 | 4.686 | 4.946 | 5.211 | 5.483 | 5.759 | 6.042 | 6.330 | 6.624 | 6.923 | 7.229 |
|            | 168   | 1.069                   | 1.231 | 1.397 | 1.569 | 1.746 | 1.929 | 2.117 | 2.310 | 2.509 | 2.713 | 2.923 | 3.138 | 3.359 | 3.585 | 3.816 | 4.053 | 4.296 | 4.544 | 4.797 | 5.056 | 5.320 | 5.591 | 5.866 | 6.147 | 6.434 | 6.726 | 7.024 |
|            | 170   | 1.014                   | 1.171 | 1.334 | 1.502 | 1.675 | 1.853 | 2.037 | 2.226 | 2.420 | 2.619 | 2.824 | 3.034 | 3.249 | 3.470 | 3.696 | 3.927 | 4.164 | 4.406 | 4.653 | 4.906 | 5.164 | 5.428 | 5.697 | 5.971 | 6.251 | 6.537 | 6.827 |
|            | 172   | 0.960                   | 1.114 | 1.273 | 1.437 | 1.606 | 1.780 | 1.959 | 2.144 | 2.333 | 2.528 | 2.728 | 2.933 | 3.143 | 3.359 | 3.579 | 3.805 | 4.037 | 4.273 | 4.514 | 4.761 | 5.013 | 5.271 | 5.534 | 5.802 | 6.075 | 6.353 | 6.637 |
|            | 174   | 0.908                   | 1.059 | 1.214 | 1.374 | 1.539 | 1.709 | 1.884 | 2.065 | 2.250 | 2.440 | 2.635 | 2.836 | 3.041 | 3.252 | 3.467 | 3.688 | 3.914 | 4.145 | 4.381 | 4.622 | 4.868 | 5.119 | 5.376 | 5.638 | 5.905 | 6.177 | 6.454 |
|            | 176   | 0.858                   | 1.005 | 1.157 | 1.313 | 1.475 | 1.641 | 1.812 | 1.988 | 2.169 | 2.355 | 2.546 | 2.742 | 2.942 | 3.148 | 3.359 | 3.574 | 3.795 | 4.021 | 4.251 | 4.487 | 4.727 | 4.973 | 5.224 | 5.479 | 5.740 | 6.006 | 6.277 |
|            | 178   | 0.810                   | 0.953 | 1.102 | 1.255 | 1.412 | 1.575 | 1.742 | 1.914 | 2.091 | 2.273 | 2.460 | 2.651 | 2.847 | 3.048 | 3.254 | 3.465 | 3.680 | 3.901 | 4.126 | 4.356 | 4.592 | 4.832 | 5.077 | 5.326 | 5.581 | 5.841 | 6.106 |
|            | 180   | 0.763                   | 0.903 | 1.048 | 1.198 | 1.352 | 1.511 | 1.675 | 1.843 | 2.016 | 2.194 | 2.376 | 2.563 | 2.755 | 2.952 | 3.153 | 3.359 | 3.570 | 3.785 | 4.005 | 4.230 | 4.460 | 4.695 | 4.934 | 5.179 | 5.428 | 5.682 | 5.941 |
|            | 182   | 0.718                   | 0.855 | 0.997 | 1.143 | 1.294 | 1.449 | 1.609 | 1.774 | 1.943 | 2.117 | 2.295 | 2.478 | 2.666 | 2.858 | 3.055 | 3.256 | 3.462 | 3.673 | 3.889 | 4.109 | 4.333 | 4.563 | 4.797 | 5.036 | 5.279 | 5.528 | 5.781 |
|            | 184   | 0.674                   | 0.808 | 0.947 | 1.090 | 1.238 | 1.390 | 1.546 | 1.707 | 1.873 | 2.043 | 2.217 | 2.396 | 2.580 | 2.768 | 2.960 | 3.157 | 3.359 | 3.565 | 3.776 | 3.991 | 4.211 | 4.435 | 4.664 | 4.898 | 5.136 | 5.379 | 5.626 |
| 186        | 0.632 | 0.763                   | 0.899 | 1.039 | 1.183 | 1.332 | 1.485 | 1.643 | 1.805 | 1.971 | 2.142 | 2.317 | 2.496 | 2.680 | 2.869 | 3.061 | 3.259 | 3.460 | 3.666 | 3.877 | 4.092 | 4.311 | 4.536 | 4.764 | 4.997 | 5.235 | 5.477 |       |
| 188        | 0.591 | 0.719                   | 0.852 | 0.989 | 1.131 | 1.276 | 1.426 | 1.580 | 1.739 | 1.901 | 2.068 | 2.240 | 2.415 | 2.595 | 2.780 | 2.968 | 3.161 | 3.359 | 3.561 | 3.767 | 3.977 | 4.192 | 4.411 | 4.635 | 4.863 | 5.095 | 5.332 |       |
| 190        | 0.551 | 0.677                   | 0.807 | 0.941 | 1.079 | 1.222 | 1.369 | 1.520 | 1.675 | 1.834 | 1.998 | 2.165 | 2.337 | 2.513 | 2.694 | 2.879 | 3.067 | 3.261 | 3.458 | 3.660 | 3.866 | 4.076 | 4.291 | 4.509 | 4.732 | 4.960 | 5.192 |       |

1.8≤BRI<3.0
3.0≤BRI<3.9
3.9≤BRI<5.0
BRI≥5.0

Figure S13. Body roundness index chart for high risk CVDRFs identification among male

BRI cut-off by BMI category for high risk CVDRFs identification among male :underweight(BMI<18.5) BRI≥1.8; normal weight(18.5≤BMI<24) BRI≥3.0; overweight (24≤BMI<28) BRI≥3.9; Obese (BMI≥28) BRI≥5.0

|            |       | Waist circumference(CM) |       |       |       |       |       |       |       |       |       |       |       |       |       |       |       |       |       |       |       |       |       |       |       |       |       |       |
|------------|-------|-------------------------|-------|-------|-------|-------|-------|-------|-------|-------|-------|-------|-------|-------|-------|-------|-------|-------|-------|-------|-------|-------|-------|-------|-------|-------|-------|-------|
|            |       | 60                      | 62    | 64    | 66    | 68    | 70    | 72    | 74    | 76    | 78    | 80    | 82    | 84    | 86    | 88    | 90    | 92    | 94    | 96    | 98    | 100   | 102   | 104   | 106   | 108   | 110   | 112   |
| Height(CM) | 146   | 1.841                   | 2.055 | 2.276 | 2.504 | 2.739 | 2.982 | 3.231 | 3.488 | 3.752 | 4.024 | 4.302 | 4.588 | 4.882 | 5.182 | 5.490 | 5.805 | 6.128 | 6.458 | 6.795 | 7.140 | 7.492 | 7.852 | 8.219 | 8.594 | 8.977 | 9.366 | 9.764 |
|            | 148   | 1.756                   | 1.964 | 2.179 | 2.401 | 2.630 | 2.866 | 3.109 | 3.359 | 3.616 | 3.880 | 4.151 | 4.429 | 4.714 | 5.007 | 5.306 | 5.613 | 5.926 | 6.247 | 6.576 | 6.911 | 7.254 | 7.603 | 7.961 | 8.325 | 8.697 | 9.076 | 9.462 |
|            | 150   | 1.675                   | 1.877 | 2.087 | 2.303 | 2.525 | 2.755 | 2.991 | 3.235 | 3.485 | 3.742 | 4.005 | 4.276 | 4.554 | 4.838 | 5.129 | 5.428 | 5.733 | 6.045 | 6.365 | 6.691 | 7.024 | 7.365 | 7.712 | 8.067 | 8.428 | 8.797 | 9.173 |
|            | 152   | 1.597                   | 1.794 | 1.998 | 2.208 | 2.425 | 2.648 | 2.879 | 3.115 | 3.359 | 3.609 | 3.866 | 4.129 | 4.399 | 4.676 | 4.960 | 5.250 | 5.548 | 5.851 | 6.162 | 6.480 | 6.804 | 7.136 | 7.474 | 7.819 | 8.171 | 8.530 | 8.895 |
|            | 154   | 1.522                   | 1.714 | 1.912 | 2.117 | 2.328 | 2.546 | 2.770 | 3.001 | 3.238 | 3.481 | 3.731 | 3.988 | 4.251 | 4.521 | 4.797 | 5.080 | 5.369 | 5.665 | 5.968 | 6.277 | 6.593 | 6.915 | 7.245 | 7.580 | 7.923 | 8.273 | 8.629 |
|            | 156   | 1.449                   | 1.637 | 1.830 | 2.029 | 2.235 | 2.447 | 2.666 | 2.891 | 3.122 | 3.359 | 3.602 | 3.852 | 4.109 | 4.371 | 4.640 | 4.916 | 5.198 | 5.486 | 5.781 | 6.082 | 6.390 | 6.704 | 7.024 | 7.351 | 7.685 | 8.025 | 8.372 |
|            | 158   | 1.380                   | 1.562 | 1.751 | 1.945 | 2.146 | 2.353 | 2.566 | 2.785 | 3.010 | 3.241 | 3.478 | 3.722 | 3.972 | 4.228 | 4.490 | 4.758 | 5.033 | 5.314 | 5.601 | 5.894 | 6.194 | 6.500 | 6.813 | 7.131 | 7.456 | 7.788 | 8.126 |
|            | 160   | 1.313                   | 1.491 | 1.675 | 1.864 | 2.060 | 2.262 | 2.469 | 2.682 | 2.902 | 3.127 | 3.359 | 3.596 | 3.840 | 4.089 | 4.345 | 4.606 | 4.874 | 5.148 | 5.428 | 5.714 | 6.006 | 6.304 | 6.609 | 6.919 | 7.236 | 7.559 | 7.889 |
|            | 162   | 1.249                   | 1.422 | 1.601 | 1.786 | 1.977 | 2.174 | 2.376 | 2.584 | 2.798 | 3.018 | 3.244 | 3.475 | 3.713 | 3.956 | 4.205 | 4.460 | 4.721 | 4.988 | 5.261 | 5.540 | 5.825 | 6.116 | 6.413 | 6.715 | 7.024 | 7.339 | 7.660 |
|            | 164   | 1.187                   | 1.356 | 1.531 | 1.711 | 1.897 | 2.089 | 2.287 | 2.490 | 2.698 | 2.913 | 3.133 | 3.359 | 3.590 | 3.828 | 4.071 | 4.320 | 4.574 | 4.835 | 5.101 | 5.373 | 5.651 | 5.934 | 6.224 | 6.519 | 6.820 | 7.127 | 7.440 |
|            | 166   | 1.127                   | 1.292 | 1.463 | 1.639 | 1.820 | 2.008 | 2.200 | 2.398 | 2.602 | 2.811 | 3.026 | 3.247 | 3.472 | 3.704 | 3.941 | 4.184 | 4.432 | 4.686 | 4.946 | 5.211 | 5.483 | 5.759 | 6.042 | 6.330 | 6.624 | 6.923 | 7.229 |
|            | 168   | 1.069                   | 1.231 | 1.397 | 1.569 | 1.746 | 1.929 | 2.117 | 2.310 | 2.509 | 2.713 | 2.923 | 3.138 | 3.359 | 3.585 | 3.816 | 4.053 | 4.296 | 4.544 | 4.797 | 5.056 | 5.320 | 5.591 | 5.866 | 6.147 | 6.434 | 6.726 | 7.024 |
|            | 170   | 1.014                   | 1.171 | 1.334 | 1.502 | 1.675 | 1.853 | 2.037 | 2.226 | 2.420 | 2.619 | 2.824 | 3.034 | 3.249 | 3.470 | 3.696 | 3.927 | 4.164 | 4.406 | 4.653 | 4.906 | 5.164 | 5.428 | 5.697 | 5.971 | 6.251 | 6.537 | 6.827 |
|            | 172   | 0.960                   | 1.114 | 1.273 | 1.437 | 1.606 | 1.780 | 1.959 | 2.144 | 2.333 | 2.528 | 2.728 | 2.933 | 3.143 | 3.359 | 3.579 | 3.805 | 4.037 | 4.273 | 4.514 | 4.761 | 5.013 | 5.271 | 5.534 | 5.802 | 6.075 | 6.353 | 6.637 |
|            | 174   | 0.908                   | 1.059 | 1.214 | 1.374 | 1.539 | 1.709 | 1.884 | 2.065 | 2.250 | 2.440 | 2.635 | 2.836 | 3.041 | 3.252 | 3.467 | 3.688 | 3.914 | 4.145 | 4.381 | 4.622 | 4.868 | 5.119 | 5.376 | 5.638 | 5.905 | 6.177 | 6.454 |
|            | 176   | 0.858                   | 1.005 | 1.157 | 1.313 | 1.475 | 1.641 | 1.812 | 1.988 | 2.169 | 2.355 | 2.546 | 2.742 | 2.942 | 3.148 | 3.359 | 3.574 | 3.795 | 4.021 | 4.251 | 4.487 | 4.727 | 4.973 | 5.224 | 5.479 | 5.740 | 6.006 | 6.277 |
|            | 178   | 0.810                   | 0.953 | 1.102 | 1.255 | 1.412 | 1.575 | 1.742 | 1.914 | 2.091 | 2.273 | 2.460 | 2.651 | 2.847 | 3.048 | 3.254 | 3.465 | 3.680 | 3.901 | 4.126 | 4.356 | 4.592 | 4.832 | 5.077 | 5.326 | 5.581 | 5.841 | 6.106 |
|            | 180   | 0.763                   | 0.903 | 1.048 | 1.198 | 1.352 | 1.511 | 1.675 | 1.843 | 2.016 | 2.194 | 2.376 | 2.563 | 2.755 | 2.952 | 3.153 | 3.359 | 3.570 | 3.785 | 4.005 | 4.230 | 4.460 | 4.695 | 4.934 | 5.179 | 5.428 | 5.682 | 5.941 |
|            | 182   | 0.718                   | 0.855 | 0.997 | 1.143 | 1.294 | 1.449 | 1.609 | 1.774 | 1.943 | 2.117 | 2.295 | 2.478 | 2.666 | 2.858 | 3.055 | 3.256 | 3.462 | 3.673 | 3.889 | 4.109 | 4.333 | 4.563 | 4.797 | 5.036 | 5.279 | 5.528 | 5.781 |
| 184        | 0.674 | 0.808                   | 0.947 | 1.090 | 1.238 | 1.390 | 1.546 | 1.707 | 1.873 | 2.043 | 2.217 | 2.396 | 2.580 | 2.768 | 2.960 | 3.157 | 3.359 | 3.565 | 3.776 | 3.991 | 4.211 | 4.435 | 4.664 | 4.898 | 5.136 | 5.379 | 5.626 |       |
| 186        | 0.632 | 0.763                   | 0.899 | 1.039 | 1.183 | 1.332 | 1.485 | 1.643 | 1.805 | 1.971 | 2.142 | 2.317 | 2.496 | 2.680 | 2.869 | 3.061 | 3.259 | 3.460 | 3.666 | 3.877 | 4.092 | 4.311 | 4.536 | 4.764 | 4.997 | 5.235 | 5.477 |       |
| 188        | 0.591 | 0.719                   | 0.852 | 0.989 | 1.131 | 1.276 | 1.426 | 1.580 | 1.739 | 1.901 | 2.068 | 2.240 | 2.415 | 2.595 | 2.780 | 2.968 | 3.161 | 3.359 | 3.561 | 3.767 | 3.977 | 4.192 | 4.411 | 4.635 | 4.863 | 5.095 | 5.332 |       |
| 190        | 0.551 | 0.677                   | 0.807 | 0.941 | 1.079 | 1.222 | 1.369 | 1.520 | 1.675 | 1.834 | 1.998 | 2.165 | 2.337 | 2.513 | 2.694 | 2.879 | 3.067 | 3.261 | 3.458 | 3.660 | 3.866 | 4.076 | 4.291 | 4.509 | 4.732 | 4.960 | 5.192 |       |

1.9 ≤ BRI < 2.9
3.9 ≤ BRI < 4.0
4.0 ≤ BRI < 5.2
BRI ≥ 5.2

Figure S14. Body roundness index chart for high risk CVDRFs identification among female

BRI cut-off by BMI category for high risk CVDRFs identification among female: underweight (BMI < 18.5) BRI ≥ 1.9; normal weight (18.5 ≤ BMI < 24) BRI ≥ 2.9; overweight (24 ≤ BMI < 28) BRI ≥ 4.0; Obese (BMI ≥ 28) BRI ≥ 5.2
